# Supplementary material for: Wide-ranging barcoding aids discovery of one-third increase of species richness in presumably well-investigated moths
Source: PubMed Central journal article supplement (PMC3793226; doi:10.1038/srep02901), 2013-10-09
Supplement: srep02901-s1.pdf [file srep02901-s1.pdf]

## Supplementary information

Wide-ranging barcoding aids discovery of one-third increase of species richness in presumably well-investigated moths

Marko Mutanen, Lauri Kaila & Jukka Tabell

Table S1. Diagnostic features of the putative new species recognized in this study. Characters given are short summaries of features that best distinguish them from their most similar relatives. Comprehensive diagnoses and descriptions, beyond the scope of this publication, will be published separately by L. Kaila (in prep). Number of morphologically examined specimens is indicated for each species in parentheses after the interim name.

| Interim name for a putative species | Diagnostic characteristics                                                                                                                                                                                                                                                                                 |
|-------------------------------------|------------------------------------------------------------------------------------------------------------------------------------------------------------------------------------------------------------------------------------------------------------------------------------------------------------|
| <i>Elachista</i> sp. 01MM (1)       | Forewing: nearly unicolorous, shiny dark grey<br>Male genitalia: large uncus, large gnathos, long and broad valva                                                                                                                                                                                          |
| <i>Elachista</i> sp. 02MM (2)       | Forewing: narrow, shiny pale grey with costal and tornal spots opposite to each other<br>Male genitalia: very large uncus lobes, very small spinose knob of the gnathos                                                                                                                                    |
| <i>Elachista</i> sp. 03MM (2)       | Forewing: dark grey, fascia extends to costa<br>Male genitalia: very small gnathos                                                                                                                                                                                                                         |
| <i>Elachista</i> sp. 04MM (1)       | Forewing: narrow, two white fasciae on grey ground colour<br>Male genitalia: small uncus lobes, long saccus                                                                                                                                                                                                |
| <i>Elachista</i> sp. 05MM (5)       | Forewing: unicolorous, creamy-coloured<br>Male genitalia: narrowly bifurcate apex of phallus, distally rounded juxta lobes                                                                                                                                                                                 |
| <i>Elachista</i> sp. 06MM (12)      | Forewing: uniquely narrow; pale yellow<br>Male genitalia: broad gnathos, apex of phallus straight-cut                                                                                                                                                                                                      |
| <i>Elachista</i> sp. 07MM (56)      | Small, stout-bodied. Forewing: ground colour black; costal and tornal spots white, separate.<br>Male genitalia: as <i>E. atricomella</i> .<br>Female genitalia: posterior margin of sternum 7 strongly curved; spines of antrum very coarse                                                                |
| <i>Elachista</i> sp. 08MM (5)       | Forewing: dark grey with three white markings, indistinct in male, distinct in female<br>Male genitalia: very broad valva, elongate uncus; female: narrow ostium, short antrum                                                                                                                             |
| <i>Elachista</i> sp. 09MM (2)       | Forewing: pale yellow, indistinct brown irroration<br>Male genitalia: broad apex of phallus; broad digitate process.<br>Female genitalia: entirely sclerotized papillae anales; specific shape of antrum                                                                                                   |
| <i>Elachista</i> sp. 10MM (1)       | Small. Forewing: ground colour pale brown; antenna: annulated with white rings<br>Male genitalia: uncus lobes large and rounded; two cornuti of equal size                                                                                                                                                 |
| <i>Elachista</i> sp. 11MM (5)       | Forewing: dark grey with three bright white markings<br>Male genitalia: small uncus lobes, long and distally widened valva; apex of phallus not bifurcate<br>Female genitalia: ostium deeply incised in sternum 7; antrum short                                                                            |
| <i>Elachista</i> sp. 12MM (21)      | Large. Forewing: dark grey with distinct white markings; shape elongate<br>Male genitalia: valva narrow and long, not broadened distally; large cornutus<br>Female genitalia: large and elongate antrum with coarse setae; inception of ductus seminalis close to antrum; base of ductus seminalis dilated |
| <i>Elachista</i> sp. 13MM (6)       | Small. Forewing: unicolorous, mottled dark grey<br>Male genitalia: valva not bent; small cornutus, small uncus lobes                                                                                                                                                                                       |
| <i>Elachista</i> sp. 14MM (15)      | Large. Forewing: ground colour suffused, grey; costal and tornal spots confluent.<br>Male genitalia: as <i>E. atricomella</i> .<br>Female genitalia: posterior margin of sternum 7 straight                                                                                                                |
| <i>Elachista</i> sp. 15MM (4)       | Forewing: mottled pale grey with confluent costal and tornal spots, dark grey spot at dorsum<br>Male genitalia: uncus lobes elongate; caecum absent                                                                                                                                                        |
| <i>Elachista</i> sp. 16MM (1)       | Forewing: mottled dark grey with irregularly shaped pale median area<br>Male genitalia: narrow phallus with one cornutus; uncus lobes proximate                                                                                                                                                            |

Table S2. Presently named Eurosiberian species of *bifasciella* group (47 spp.). The area considered covers Palearctic region excluding Japan and Russia: Sakhalin and the Primorsk region. Himalaya is also excluded. From North Africa, also a part of the Palearctic region, no species of *E. bifasciella* group has been reported.

*Elachista adelpha* Kaila & Jalava, 1994  
*Elachista albicapilla* Höfner, 1918  
*Elachista albifrontella* (Hübner, (1817)  
*Elachista alpinella* Stainton, 1854  
*Elachista anserinella* Zeller, 1839  
*Elachista anserinelloides* Nel, 2003  
*Elachista apicipunctella* Stainton, 1849  
*Elachista argentifasciella* Höfner, 1898  
*Elachista atricomella* Stainton, 1849  
*Elachista baikalica* Kaila, 1992  
*Elachista bicingulella* Sruoga, 1992  
*Elachista bifasciella* Treitschke, 1833  
*Elachista canapennella* (Hübner, 1813)  
*Elachista compsa* Traugott-Olsen, 1974  
*Elachista deriventa* Kaila & Mutanen, 2008  
*Elachista diderichsiella* Hering, 1889  
*Elachista dimicatella* Rebel, 1903  
*Elachista elegans* Frey, 1859  
*Elachista eskoi* Kyrki & Karvonen, 1985  
*Elachista excelsicola* Braun, 1948  
*Elachista fuscofrontella* Sruoga, 1990  
*Elachista grandiferella* Sruoga, 1992  
*Elachista griseella* (Duponchel, 1843)  
*Elachista gruenewaldi* Parenti, 2002  
*Elachista herrichii* Frey, 1859  
*Elachista humilis* Zeller, 1850  
*Elachista irenae* Buszko, 1989  
*Elachista jaskai* Kaila, 1998  
*Elachista kilmunella* Stainton, 1849  
*Elachista krogeri* Svensson, 1976  
*Elachista lastrella* Chrétien, 1896  
*Elachista leifi* Kaila & Kerppola, 1992  
*Elachista luticomella* Zeller, 1839  
*Elachista maculicerusella* (Bruand, 1859)  
*Elachista maculosella* Chrétien, 1896  
*Elachista nielswolffi* Svensson, 1976  
*Elachista nobilella* Zeller, 1839  
*Elachista orstadii* Palm, 1943  
*Elachista poae* Stainton, 1855

*Elachista pomerana* Frey, 1870  
*Elachista rufocinerea* (Haworth, 1828)  
*Elachista stenopterella* Rebel, 1932  
*Elachista subnigrella* Douglas, 1853  
*Elachista sulcsiella* Savenkov, 2013  
*Elachista talgarella* Kaila, 1992  
*Elachista tanaella* Aarvik & Berggren, 2004  
*Elachista vonschantzi* Svensson, 1976  
*Elachista wieseriella* Huemer, 2000  
*Elachista zernyi* Hartig, 1941

Table S3. Specimen information.

| Sample ID | Species                        | Seq. Length | Sex | Collectors                                                    | Collection Date | Country | Locality                                                      | Lat   | Lon   | Elev | Notes              |
|-----------|--------------------------------|-------------|-----|---------------------------------------------------------------|-----------------|---------|---------------------------------------------------------------|-------|-------|------|--------------------|
| MM17678   | <i>Elachista abiskoella</i>    | 657[1n]     |     | Erkki Laasonen, Leena Laasonen                                | 01-Jul-2001     | Finland | Laponia inarenensis, Inari                                    | 68,39 | 28,22 |      |                    |
| MM18594   | <i>Elachista abiskoella</i>    | 658         |     | Bengt A. Bengtsson                                            | 02-Jul-2004     | Sweden  | To, Abisko, Oestra                                            | 68,30 | 18,70 |      |                    |
| MM19891   | <i>Elachista abiskoella</i>    | 658         | M   | Erkki Laasonen, Leena Laasonen                                |                 | Finland | Laponia inarenensis, Inari                                    | 68,47 | 28,28 |      |                    |
| MM20832   | <i>Elachista albicapilla</i>   | 658         | M   | P. Huemer                                                     | 06-Aug-1996     | France  | Alpes-Maritimes, Marguareis W-Hang, Navela                    | 44,16 | 7,66  | 2150 |                    |
| MM02662   | <i>Elachista albifrontella</i> | 657[1n]     |     | Marko Mutanen, Panu Vaelimaeki                                |                 | Finland | Karelia australis, Imatra                                     | 61,11 | 28,80 |      |                    |
| MM06161   | <i>Elachista albifrontella</i> | 658         |     | Marko Mutanen, Tomi Mutanen                                   | 18.-17.6.2007   | Finland | Karelia ladogensis, Parikkala                                 | 61,64 | 29,64 |      |                    |
| MM06514   | <i>Elachista albifrontella</i> | 658         | M   | Marko Mutanen, Nestori Mutanen                                | 03-Jul-2007     | Finland | Ostrobotnia borealis pars australis, Hailuoto                 | 65,05 | 24,88 |      |                    |
| MM06598   | <i>Elachista albifrontella</i> | 658         | F   | Tomi Mutanen, Marko Mutanen, Nestori Mutanen, Anttoni Mutanen | 6.-7.7.2007     | Finland | Karelia borealis, Ilomantsi                                   | 62,51 | 30,88 |      |                    |
| MM12029   | <i>Elachista albifrontella</i> | 658         |     | Marko Mutanen, Panu Vaelimaeki                                | 2007            | Finland | Nylandia, Hanko                                               | 59,84 | 23,24 |      |                    |
| MM14235   | <i>Elachista albifrontella</i> | 658         |     | Marko Mutanen, Nestori Mutanen, Anttoni Mutanen               | 29-Jun-2009     | Finland | Aland Islands, Eckerö                                         | 60,24 | 19,59 |      |                    |
| MM14309   | <i>Elachista albifrontella</i> | 658         |     | family Marko Mutanen                                          | 30-Jun-2009     | Finland | Aland Islands, Finstroem                                      | 60,23 | 19,83 |      |                    |
| MM20887   | <i>Elachista albifrontella</i> | 658         | M   | T. Nupponen, K. Nupponen                                      | 24-Jun-2000     | Russia  | Altai Krai, Altai Mts., Sarlyk region                         | 51,00 | 85,58 | 1450 |                    |
| MM20891   | <i>Elachista albifrontella</i> | 658         | M   | T. Nupponen, K. Nupponen                                      | 23-Jun-2000     | Russia  | Altai Krai, Altai Mts., Katun valley, 10 km SE Ust-Sema vill. | 51,58 | 85,92 | 700  |                    |
| MM03989   | <i>Elachista alpinella</i>     | 639         |     | Marko Mutanen                                                 | 14-Jul-2006     | Finland | Ostrobotnia borealis pars australis, Kiiminki                 | 65,07 | 25,73 |      |                    |
| MM06929   | <i>Elachista alpinella</i>     | 658         | M   | Marko Mutanen, Nestori Mutanen, Anttoni Mutanen               | 26-Jul-2007     | Finland | Ostrobotnia borealis pars australis, Kiiminki                 | 65,07 | 25,73 |      |                    |
| MM10427   | <i>Elachista alpinella</i>     | 658         |     | Marko Mutanen                                                 | 15-Jul-2004     | Finland | Ostrobotnia borealis pars australis, Kiiminki                 | 65,07 | 25,73 |      |                    |
| MM12473   | <i>Elachista alpinella</i>     | 658         |     | Marko Mutanen, Panu Vaelimaeki                                | 2007            | Finland | Savonia australis, Imatra                                     | 61,11 | 28,80 |      |                    |
| MM16180   | <i>Elachista alpinella</i>     | 658         | M   | Jalava, Kullberg, Koponen                                     | 08-Jul-1994     | Russia  | Polar Ural, Krasnyi Kamen                                     | 66,08 | 65,17 |      | L.Kaila prep. 1373 |
| MM21196   | <i>Elachista alpinella</i>     | 658         |     | Marko Mutanen                                                 | 10-Jul-2011     | Finland | Regio kuusamoensis, Kuusamo                                   | 66,38 | 29,43 |      |                    |
| MM18556   | <i>Elachista anserinella</i>   | 658         |     | Ingvar Svensson                                               | 06-Jun-2006     | Sweden  | Gotland, Loista                                               | 57,31 | 18,36 |      |                    |
| MM19870   | <i>Elachista anserinella</i>   | 407         |     | N. Savenkov, I. Savenkov                                      | 09-Jun-2006     | Sweden  | Gotland, Silte                                                | 57,21 | 18,23 |      |                    |

|         |                                 |     |   |                                                                  |                             |          |                                                                            |       |            |      |                                 |
|---------|---------------------------------|-----|---|------------------------------------------------------------------|-----------------------------|----------|----------------------------------------------------------------------------|-------|------------|------|---------------------------------|
| MM21442 | <i>Elachista anserinella</i>    | 658 | M | N. Savenkov                                                      | 17-May-2010                 | Bulgaria | Pirin, Sandanski Ploski                                                    | 41,64 | 23,26      | 250  |                                 |
| MM02659 | <i>Elachista apicipunctella</i> | 658 |   | Marko Mutanen, Panu Vaelimaeki                                   |                             | Finland  | Karelia australis, Imatra                                                  | 61,11 | 28,80      |      |                                 |
| MM02660 | <i>Elachista apicipunctella</i> | 658 |   | Marko Mutanen, Panu Vaelimaeki                                   |                             | Finland  | Karelia australis, Imatra                                                  | 61,11 | 28,80      |      |                                 |
| MM06170 | <i>Elachista apicipunctella</i> | 658 |   | Marko Mutanen, Tomi Mutanen                                      | 18.-17.6.2007               | Finland  | Karelia ladogensis, Parikkala                                              | 61,64 | 29,64      |      |                                 |
| MM06173 | <i>Elachista apicipunctella</i> | 658 |   | Marko Mutanen, Tomi Mutanen                                      | 18.-17.6.2007               | Finland  | Karelia ladogensis, Parikkala                                              | 61,64 | 29,64      |      |                                 |
| MM06225 | <i>Elachista apicipunctella</i> | 658 |   | Marko Mutanen                                                    | 19-Jun-2007                 | Finland  | Karelia australis, Joutseno                                                | 61,06 | 28,72      |      |                                 |
| MM06271 | <i>Elachista apicipunctella</i> | 658 | M | Marko Mutanen, Nestori Mutanen, Anttoni Mutanen                  | 22.-23.6.2007               | Finland  | Ostrobothnia borealis pars australis, Kiiminki                             | 65,07 | 25,73      |      |                                 |
| MM06272 | <i>Elachista apicipunctella</i> | 658 | F | Marko Mutanen, Nestori Mutanen, Anttoni Mutanen                  | 22.-23.6.2007               | Finland  | Ostrobothnia borealis pars australis, Kiiminki                             | 65,07 | 25,73      |      |                                 |
| MM08382 | <i>Elachista apicipunctella</i> | 658 |   | Marko Mutanen, Panu Vaelimaeki                                   | 17.-18.6.2005               | Finland  | Tavastia australis, Loppi                                                  | 60,65 | 24,08      |      |                                 |
| MM09050 | <i>Elachista apicipunctella</i> | 658 |   | Marko Mutanen, Panu Vaelimaeki                                   | 2006                        | Finland  | Karelia ladogensis, Simpele                                                | 61,42 | 29,32      |      |                                 |
| MM14139 | <i>Elachista apicipunctella</i> | 658 |   | Marko Mutanen, Nestori Mutanen, Anttoni Mutanen, Rosella Mutanen | 19-Jun-2009                 | Finland  | Ostrobothnia borealis pars australis, Kiiminki                             | 65,07 | 25,73      |      |                                 |
| MM14208 | <i>Elachista apicipunctella</i> | 658 |   | Marko Mutanen                                                    | 24-Jun-2009                 | Finland  | Ostrobothnia borealis pars australis, Oulu                                 | 64,94 | 25,46      |      |                                 |
| MM14270 | <i>Elachista apicipunctella</i> | 658 |   | family Marko Mutanen                                             | 30-Jun-2009                 | Finland  | Aland Islands, Geta                                                        | 60,33 | 19,91      |      |                                 |
| MM20930 | <i>Elachista apicipunctella</i> | 658 | M | K. Nupponen                                                      | 17-Jun-2002                 | Russia   | Irkutsk, Irkutsk prov., Sludjanka village 2 km SE, Lake Baikal shope slope | 51,67 | 103,7<br>2 | 500  |                                 |
| MM20935 | <i>Elachista apicipunctella</i> | 658 | M | K. Nupponen                                                      | 17-Jun-2002                 | Russia   | Irkutsk, Irkutsk prov., Sludjanka village 2 km SE, Lake Baikal shope slope | 51,67 | 103,7<br>2 | 500  |                                 |
| MM16223 | <i>Elachista atricomella</i>    | 658 | M | J. Tabell                                                        | ex larva em.<br>11-Jun-2008 | Estonia  | Vasalemma                                                                  | 59,24 | 24,29      |      | Dactylis glomerata<br>19.V.2008 |
| MM17256 | <i>Elachista atricomella</i>    | 591 |   | Aalto, Raesaenen                                                 | 06-Jun-2006                 | Sweden   | Oland, Graeborg                                                            | 56,66 | 16,59      |      |                                 |
| MM17257 | <i>Elachista atricomella</i>    | 658 |   | Aalto, Raesaenen                                                 | 06-Jun-2006                 | Sweden   | Oland, Graeborg                                                            | 56,66 | 16,59      |      |                                 |
| MM18546 | <i>Elachista atricomella</i>    | 658 |   | Ingvar Svensson                                                  | 23-Jul-2008                 | Sweden   | Gotland, Totta Blaehaell                                                   | 57,53 | 18,11      |      |                                 |
| MM18547 | <i>Elachista atricomella</i>    | 658 |   | Ingvar Svensson                                                  | 19-Jul-1999                 | Sweden   | Gotland, Norrlanda                                                         | 57,50 | 18,60      |      |                                 |
| MM19862 | <i>Elachista atricomella</i>    | 658 |   | Ingvar Svensson                                                  | 11-Jul-2008                 | Sweden   | Uppland, Haeveroe, Vaesternaes                                             | 59,70 | 18,70      |      |                                 |
| MM20022 | <i>Elachista atricomella</i>    | 658 | M | J. Tabell                                                        | 08-Jun-2008                 | Estonia  | Saaremaa, Vasalemma                                                        | 59,24 | 24,28      |      |                                 |
| MM20023 | <i>Elachista atricomella</i>    | 658 | F | J. Tabell                                                        | 15-Jun-2008                 | Estonia  | Saaremaa, Vasalemma                                                        | 59,24 | 24,28      |      |                                 |
| MM20918 | <i>Elachista atricomella</i>    | 658 | M | J. Junnilainen                                                   | 09-May-2000                 | Estonia  | Tallinn                                                                    | 59,40 | 24,70      |      |                                 |
| MM20937 | <i>Elachista atricomella</i>    | 658 | M | J. Junnilainen                                                   | 21-Jun-2001                 | Bulgaria | Pirin, Popovi Livadi                                                       | 41,53 | 23,61      | 1300 |                                 |

|         |                               |     |   |                                                   |                        |             |                                                          |       |       |      |                     |
|---------|-------------------------------|-----|---|---------------------------------------------------|------------------------|-------------|----------------------------------------------------------|-------|-------|------|---------------------|
| MM20938 | <i>Elachista atricomella</i>  | 658 | M | J. Junnilainen                                    | 21-Jun-2001            | Bulgaria    | Pirin, Popovi Livadi                                     | 41,53 | 23,61 | 1300 |                     |
| MM20940 | <i>Elachista atricomella</i>  | 658 | M | J-P. Kaitila                                      | 31-May-2002            | Bulgaria    | Kresna                                                   | 41,72 | 23,16 |      |                     |
| MM20942 | <i>Elachista atricomella</i>  | 658 | M | J-P. Kaitila                                      | 18-May-2003            | Greece      | Leptokaria 15 km W, Olympos                              | 40,10 | 22,30 | 750  |                     |
| MM20987 | <i>Elachista atricomella</i>  | 658 | M | J. Junnilainen                                    | 01-Jun-2008            | Croatia     | Platak                                                   | 45,41 | 14,56 | 1000 |                     |
| MM20988 | <i>Elachista atricomella</i>  | 658 | M | J. Junnilainen                                    | 01-Jun-2008            | Croatia     | Platak                                                   | 45,41 | 14,56 | 1000 |                     |
| MM20989 | <i>Elachista atricomella</i>  | 658 | M | J. Junnilainen                                    | 01-Jun-2008            | Croatia     | Platak                                                   | 45,41 | 14,56 | 1000 |                     |
| MM21386 | <i>Elachista atricomella</i>  | 658 | M | I. Richter                                        | 30-May-2003            | Slovakia    | Vysehrad                                                 | 48,80 | 18,60 |      |                     |
| MM21387 | <i>Elachista atricomella</i>  | 658 | M | Z. Tokar                                          | 03-Jun-2005            | Slovenia    | Pterijnski kras                                          | 45,57 | 13,91 |      |                     |
| MM21444 | <i>Elachista atricomella</i>  | 658 | M | O. Karsholt                                       | 17-May-1994            | Greece      | Macedonia, Olympos mts.                                  | 40,05 | 22,25 |      |                     |
| MM21445 | <i>Elachista atricomella</i>  | 532 | M | O. Karsholt                                       | 21-May-1994            | Greece      | Macedonia, Olympos mts.                                  | 40,05 | 22,25 |      |                     |
| MM21447 | <i>Elachista atricomella</i>  | 658 | M | O. Karsholt                                       | 28-Aug-1991            | Austria     | Tirol, Kals                                              | 47,00 | 12,64 | 1100 |                     |
| MM17656 | <i>Elachista baikalica</i>    | 658 |   | K. Nupponen, J. Kaitila, J. Junnilainen, M. Ahola | 28-Jun-1996            | Russia      | Chelyabinsk, South Ural, Miass town, Ilmen State Reserve | 55,01 | 60,10 | 350  |                     |
| MM16162 | <i>Elachista bifasciella</i>  | 658 | M | J. Tabell                                         | 16-Jun-1905            | Sweden      | Skane, Roessjoeholm                                      | 56,20 | 13,20 |      | L. Kaila prep. 1788 |
| MM16163 | <i>Elachista bifasciella</i>  | 627 | F | J. Tabell                                         | 16-Jun-1905            | Sweden      | Skane, Roessjoeholm                                      | 56,20 | 13,20 |      |                     |
| MM16164 | <i>Elachista bifasciella</i>  | 658 | F | J. Tabell                                         | 16-Jun-1905            | Sweden      | Skane, Roessjoeholm                                      | 56,20 | 13,20 |      |                     |
| MM16165 | <i>Elachista bifasciella</i>  | 658 | F | J. Tabell                                         | 16-Jun-1905            | Sweden      | Skane, Roessjoeholm                                      | 56,20 | 13,20 |      |                     |
| MM16167 | <i>Elachista bifasciella</i>  | 658 | M | P. Huemer                                         | 24-Jul-1995            | Italy       | South Tyrol, Ritten, Obergruenwald                       | 46,55 | 11,42 |      |                     |
| MM18548 | <i>Elachista bifasciella</i>  | 658 |   | Ingvar Svensson                                   | ex larva 16.-18.5.2009 | Sweden      | Sk, Everoed                                              | 55,90 | 14,08 |      |                     |
| MM18549 | <i>Elachista bifasciella</i>  | 658 |   | Ingvar Svensson                                   | ex larva 16.-18.5.2009 | Sweden      | Sk, Everoed                                              | 55,90 | 14,08 |      |                     |
| MM21664 | <i>Elachista bifasciella</i>  | 658 | F | L. Kaila, J. Tabell                               | 26-May-2011            | Switzerland | Linthal 3 km SW                                          | 46,88 | 8,96  |      |                     |
| MM21665 | <i>Elachista bifasciella</i>  | 658 | F | L. Kaila, J. Tabell                               | 24-May-2011            | Switzerland | Linthal 3 km SW                                          | 46,88 | 8,96  |      |                     |
| MM02669 | <i>Elachista canapennella</i> | 658 |   | Marko Mutanen, Panu Vaelimaeki                    |                        | Finland     | Karelia australis, Imatra                                | 61,11 | 28,80 |      |                     |
| MM02670 | <i>Elachista canapennella</i> | 658 |   | Marko Mutanen, Panu Vaelimaeki                    |                        | Finland     | Karelia australis, Imatra                                | 61,11 | 28,80 |      |                     |
| MM05360 | <i>Elachista canapennella</i> | 658 |   | Marko Mutanen                                     | -24.5.2006             | Finland     | Regio Aboensis, Turku                                    | 60,44 | 22,20 |      |                     |
| MM05361 | <i>Elachista canapennella</i> | 637 |   | Marko Mutanen                                     | -24.5.2006             | Finland     | Regio Aboensis, Turku                                    | 60,44 | 22,20 |      |                     |
| MM06187 | <i>Elachista canapennella</i> | 658 |   | Marko Mutanen, Tomi Mutanen                       | 18.-17.6.2007          | Finland     | Karelia ladogensis, Parikkala                            | 61,64 | 29,64 |      |                     |
| MM06302 | <i>Elachista canapennella</i> | 658 | M | Marko Mutanen, Nestori Mutanen, Anttoni Mutanen   | 27-Jun-2007            | Finland     | Laponia kemensis pars orientalis, Sodankylä              | 68,22 | 27,22 |      |                     |
| MM06523 | <i>Elachista canapennella</i> | 658 | F | Marko Mutanen, Nestori Mutanen                    | 03-Jul-2007            | Finland     | Ostrobothnia borealis pars australis, Hailuoto           | 65,05 | 24,88 |      |                     |
| MM06565 | <i>Elachista canapennella</i> | 658 | M | Marko Mutanen, Anttoni Mutanen, Nestori Mutanen   | 03-Jul-2007            | Finland     | Ostrobothnia borealis pars australis, Hailuoto           | 65,00 | 24,69 |      |                     |

|         |                               |     |   |                                                 |                      |         |                                                                                       |       |       |     |                     |
|---------|-------------------------------|-----|---|-------------------------------------------------|----------------------|---------|---------------------------------------------------------------------------------------|-------|-------|-----|---------------------|
| MM09868 | <i>Elachista canapennella</i> | 658 |   | Marko Mutanen                                   | 17-Jun-2008          | Finland | Karelia australis, Joutseno                                                           | 61,06 | 28,72 |     |                     |
| MM13896 | <i>Elachista canapennella</i> | 658 |   | Marko Mutanen                                   | 18-May-2009          | Finland | Regio Aboensis, Turku                                                                 | 60,33 | 22,24 |     |                     |
| MM13967 | <i>Elachista canapennella</i> | 658 |   | Marko Mutanen                                   | 05-Jun-2009          | Finland | Ostrobothnia borealis pars australis, Kiiminki                                        | 65,07 | 23,81 |     |                     |
| MM14269 | <i>Elachista canapennella</i> | 658 |   | family Marko Mutanen                            | 30-Jun-2009          | Finland | Aland Islands, Geta                                                                   | 60,33 | 19,91 |     |                     |
| MM14445 | <i>Elachista canapennella</i> | 658 |   | Marko Mutanen, Nestori Mutanen, Anttoni Mutanen | 09-Jul-2009          | Finland | Ostrobothnia kajanensis, Ristijärvi                                                   | 64,43 | 28,18 |     |                     |
| MM14542 | <i>Elachista canapennella</i> | 658 |   | Marko Mutanen                                   | 10-Jul-2009          | Finland | Ostrobothnia borealis pars australis, Hailuoto                                        | 64,94 | 24,72 |     |                     |
| MM16150 | <i>Elachista canapennella</i> | 658 | M | J. Jalava, J. Kullberg                          | 02-Jun-1995          | Russia  | Krasnoyarsk Krai, Krasnojarsk kr., Tanzybei                                           | 53,13 | 92,88 |     | L. Kaila prep. 1838 |
| MM16151 | <i>Elachista canapennella</i> | 658 | M | J. Jalava, J. Kullberg                          | 03-Jun-1995          | Russia  | Krasnoyarsk Krai, Krasnojarsk kr., Tanzybei                                           | 53,13 | 92,88 |     | L. Kaila prep. 1839 |
| MM16153 | <i>Elachista canapennella</i> | 658 | M | J. Jalava, J. Kullberg                          | 05-Jun-1995          | Russia  | Krasnoyarsk Krai, Krasnojarsk kr., Tanzybei                                           | 53,13 | 92,88 |     |                     |
| MM18826 | <i>Elachista canapennella</i> | 658 |   | Marko Mutanen                                   | 28.-31.7.2003        | Finland | Nylandia, Kirkkonummi                                                                 | 59,93 | 24,32 |     |                     |
| MM20905 | <i>Elachista canapennella</i> | 658 | M | K. Nupponen                                     | 11-Jul-2003          | Russia  | Sverdlovskaya, Sverdlovsk district, North Ural, near Kytlym village, Kosvinskij Kamen | 59,52 | 59,11 | 600 | L. Kaila Prep. 4079 |
| MM21092 | <i>Elachista canapennella</i> | 658 |   | Tomi Mutanen                                    | 7.-8.8.2011          | Finland | Regio aboensis, Salo                                                                  | 60,34 | 23,11 |     |                     |
| MM10317 | <i>Elachista compsa</i>       | 658 |   | Tomi Mutanen                                    | 02-Jul-2008          | Finland | Regio kuusamoensis, Kuusamo                                                           | 66,31 | 29,45 |     |                     |
| MM10423 | <i>Elachista compsa</i>       | 658 |   | Marko Mutanen                                   | 27-Jun-2005          | Finland | Ostrobothnia borealis pars australis, Kiiminki                                        | 65,07 | 25,73 |     |                     |
| MM10424 | <i>Elachista compsa</i>       | 658 |   | Marko Mutanen                                   | 27-Jun-2005          | Finland | Ostrobothnia borealis pars australis, Kiiminki                                        | 65,07 | 25,73 |     |                     |
| MM12148 | <i>Elachista compsa</i>       | 658 |   | Marko Mutanen, Panu Vaelimaeki                  | 2007                 | Finland | Nylandia, Hanko                                                                       | 59,84 | 23,24 |     |                     |
| MM12149 | <i>Elachista compsa</i>       | 658 |   | Marko Mutanen, Panu Vaelimaeki                  | 2007                 | Finland | Nylandia, Hanko                                                                       | 59,84 | 23,24 |     |                     |
| MM18827 | <i>Elachista compsa</i>       | 658 |   | Marko Mutanen                                   | 17-Jun-2008          | Finland | Savonia australis, Joutseno                                                           | 61,06 | 28,72 |     |                     |
| MM20043 | <i>Elachista compsa</i>       | 658 | M | J. Tabell                                       | larva 2009, em. 2010 | Finland | Tavastia australis, Hartola                                                           | 61,59 | 25,94 |     |                     |
| MM04316 | <i>Elachista deriventa</i>    | 621 |   | Marko Mutanen, Panu Vaelimaeki                  | 18-Jun-2005          | Finland | Tavastia australis, Loppi                                                             | 60,67 | 24,22 |     |                     |
| MM14008 | <i>Elachista deriventa</i>    | 658 |   | Marko Mutanen                                   | 13.-14.6.2009        | Finland | Karelia borealis, Tuupovaara                                                          | 62,38 | 30,91 |     |                     |
| MM14009 | <i>Elachista deriventa</i>    | 658 |   | Marko Mutanen                                   | 13.-14.6.2009        | Finland | Karelia borealis, Tuupovaara                                                          | 62,38 | 30,91 |     |                     |
| MM14010 | <i>Elachista deriventa</i>    | 658 |   | Marko Mutanen                                   | 13.-14.6.2009        | Finland | Karelia borealis, Tuupovaara                                                          | 62,38 | 30,91 |     |                     |
| MM14011 | <i>Elachista deriventa</i>    | 658 |   | Marko Mutanen                                   | 13.-14.6.2009        | Finland | Karelia borealis, Tuupovaara                                                          | 62,38 | 30,91 |     |                     |
| MM14012 | <i>Elachista deriventa</i>    | 658 |   | Marko Mutanen                                   | 13.-14.6.2009        | Finland | Karelia borealis, Tuupovaara                                                          | 62,38 | 30,91 |     |                     |



|         |                          |         |   |                                                 |                    |         |                                             |       |       |                                                   |
|---------|--------------------------|---------|---|-------------------------------------------------|--------------------|---------|---------------------------------------------|-------|-------|---------------------------------------------------|
| MM15197 | Elachista deriventa      | 658     |   | Ali Karhu                                       | 11-Sep-2010        | Finland | Karelia borealis, Liperi                    | 62,49 | 29,13 | larca on Calamagrostis sp., no voucher GP 4652 JT |
| MM16310 | Elachista deriventa      | 658     | M | J. Tabell                                       | 17-Jun-2008        | Finland | Tavastia australis, Hartola                 | 61,43 | 25,91 |                                                   |
| MM05677 | Elachista diderichsiella | 658     | M | Petri Hirvonen, Panu Vaelimaeki                 | 03-Jul-2007        | Finland | Lapland, Lapponia inarensis, Utsjoki        | 69,40 | 25,83 |                                                   |
| MM05678 | Elachista diderichsiella | 658     | F | Petri Hirvonen, Panu Vaelimaeki                 | 03-Jul-2007        | Finland | Lapland, Lapponia inarensis, Utsjoki        | 69,52 | 25,87 |                                                   |
| MM06224 | Elachista diderichsiella | 658     |   | Marko Mutanen                                   | 19-Jun-2007        | Finland | Karelia australis, Joutseno                 | 61,06 | 28,72 |                                                   |
| MM08330 | Elachista diderichsiella | 658     |   | Marko Mutanen                                   | 5.-12.7.2006       | Finland | Ostrobothnia borealis pars borealis, Tornio | 65,90 | 24,45 |                                                   |
| MM09219 | Elachista diderichsiella | 658     |   | Petri Hirvonen, Marko Mutanen                   | May 2009           | Finland | Ostrobothnia borealis pars borealis, Tornio | 65,79 | 24,23 |                                                   |
| MM09240 | Elachista diderichsiella | 658     | M | Petri Hirvonen, Marko Mutanen                   | ex larva 2009      | Finland | Ostrobothnia borealis pars borealis, Tornio | 65,79 | 24,23 |                                                   |
| MM09241 | Elachista diderichsiella | 658     | M | Petri Hirvonen, Marko Mutanen                   | ex larva 2009      | Finland | Ostrobothnia borealis pars borealis, Tornio | 65,79 | 24,23 |                                                   |
| MM15491 | Elachista diderichsiella | 657[1n] | M | Jalava, Kullberg, Koponen                       | 12-Jul-1994        | Russia  | Polar Ural, Krasnyi Kamen                   | 66,08 | 65,17 | L. Kaila prep. 1372                               |
| MM16191 | Elachista diderichsiella | 658     | M | A. Albrecht                                     | 04-Jun-1990        | Estonia | Paernu r., Nigula, Salupeaksi               | 58,30 | 24,40 | L. Kaila prep. 2711                               |
| MM16192 | Elachista diderichsiella | 658     | M | A. Albrecht                                     | 04-Jun-1990        | Estonia | Paernu r., Nigula, Salupeaksi               | 58,30 | 24,40 | L. Kaila prep. 451                                |
| MM16193 | Elachista diderichsiella | 658     | M | K. Mikkola                                      | 13-Jul-2003        | Norway  | Fn, Berlevaeg, Guldofjord                   | 70,80 | 29,00 | L. Kaila prep. 3730                               |
| MM16194 | Elachista diderichsiella | 658     | M | K. Mikkola                                      | 13-Jul-2003        | Norway  | Fn, Berlevaeg, Guldofjord                   | 70,80 | 29,00 |                                                   |
| MM16195 | Elachista diderichsiella | 658     | M | K. Mikkola                                      | 13-Jul-2003        | Norway  | Fn, Berlevaeg, Guldofjord                   | 70,80 | 29,00 |                                                   |
| MM16197 | Elachista diderichsiella | 658     | M | Jalava, Kullberg, Koponen                       | 08-Jul-1994        | Russia  | Polar Ural, Krasnyi Kamen                   | 66,08 | 65,17 | L. Kaila prep. 1958                               |
| MM16198 | Elachista diderichsiella | 658     | M | Jalava, Kullberg, Koponen                       | 09-Jul-1994        | Russia  | Polar Ural, Krasnyi Kamen                   | 66,08 | 65,17 | L. Kaila prep. 1370                               |
| MM16199 | Elachista diderichsiella | 658     | M | Jalava, Kullberg, Koponen                       | 10-Jul-1994        | Russia  | Polar Ural, Krasnyi Kamen                   | 66,08 | 65,17 | L. Kaila prep. 1957                               |
| MM16200 | Elachista diderichsiella | 633     | M | Jalava, Kullberg, Koponen                       | 11-Jul-1994        | Russia  | Polar Ural, Krasnyi Kamen                   | 66,08 | 65,17 | L. Kaila prep. 1956                               |
| MM16315 | Elachista diderichsiella | 658     | F | R. Siloaho                                      | 01-Jul-2008        | Finland | Lapland, Lapponia inarensis, Utsjoki        | 69,95 | 27,29 |                                                   |
| MM16316 | Elachista diderichsiella | 658     | F | J. Tabell                                       | ex larva 31.5.2007 | Finland | Karelia australis, Joutseno                 | 61,07 | 28,70 | Milium effusum 11.V.2007                          |
| MM17965 | Elachista diderichsiella | 658     |   | Marko Mutanen, Nestori Mutanen, Anttoni Mutanen | 11-Jul-2010        | Finland | Lapponia inarensis, Utsjoki                 | 69,43 | 26,01 |                                                   |
| MM17966 | Elachista diderichsiella | 658     |   | Marko Mutanen, Nestori Mutanen, Anttoni Mutanen | 11-Jul-2010        | Finland | Lapponia inarensis, Utsjoki                 | 69,43 | 26,01 |                                                   |
| MM17967 | Elachista diderichsiella | 658     |   | Marko Mutanen, Nestori Mutanen, Anttoni Mutanen | 11-Jul-2010        | Finland | Lapponia inarensis, Utsjoki                 | 69,43 | 26,01 |                                                   |

|         |                                |         |   |                                                 |               |         |                                                                                       |       |        |                                          |
|---------|--------------------------------|---------|---|-------------------------------------------------|---------------|---------|---------------------------------------------------------------------------------------|-------|--------|------------------------------------------|
| MM17968 | <i>Elachista diderichiella</i> | 658     |   | Marko Mutanen, Nestori Mutanen, Anttoni Mutanen | 11-Jul-2010   | Finland | Laponia inarenensis, Utsjoki                                                          | 69,43 | 26,01  |                                          |
| MM17969 | <i>Elachista diderichiella</i> | 658     |   | Marko Mutanen, Nestori Mutanen, Anttoni Mutanen | 11-Jul-2010   | Finland | Laponia inarenensis, Utsjoki                                                          | 69,43 | 26,01  |                                          |
| MM17970 | <i>Elachista diderichiella</i> | 658     |   | Marko Mutanen, Nestori Mutanen, Anttoni Mutanen | 11-Jul-2010   | Finland | Laponia inarenensis, Utsjoki                                                          | 69,43 | 26,01  |                                          |
| MM20881 | <i>Elachista diderichiella</i> | 658     | F | T. Nupponen, K. Nupponen                        | 08-Jul-2000   | Russia  | Altai Krai, Altai Mts., Sarlyk region                                                 | 51,00 | 85,58  | 1450                                     |
| MM20890 | <i>Elachista diderichiella</i> | 657[1n] | M | T. Nupponen, K. Nupponen                        | 05-Jul-2000   | Russia  | Altai Krai, Altai Mts., Chuja valley 5 km SE Aktash village                           | 50,25 | 87,67  | 1500                                     |
| MM20903 | <i>Elachista diderichiella</i> | 658     | F | K. Nupponen                                     | 11-Jul-2003   | Russia  | Sverdlovskaya, Sverdlovsk district, North Ural, near Kytlym village, Kosvinskij Kamen | 59,52 | 59,11  | 600                                      |
| MM20925 | <i>Elachista diderichiella</i> | 658     | F | Timo Nupponen, Kari Nupponen                    | 14-Jul-1999   | Russia  | Tyumenskaya, Tjumen district, Polar-Ural, Labytnangi                                  | 66,66 | 65,66  | 50                                       |
| MM20936 | <i>Elachista diderichiella</i> | 658     | M | K. Nupponen                                     | 17-Jun-2002   | Russia  | Irkutsk, Irkutsk prov., Sludjanka village 2 km SE, Lake Baikal shope slope            | 51,67 | 103,72 | 500                                      |
| MM20976 | <i>Elachista diderichiella</i> | 658     | M | Timo Nupponen, Kari Nupponen                    | 10-Jul-1999   | Russia  | Tyumenskaya, Tjumen district, Polar-Ural, Krasnyi Kamen                               | 66,93 | 65,66  | 200                                      |
| MM21424 | <i>Elachista diderichiella</i> | 658     | M | G. Stahls                                       | 11-Jun-1990   | Russia  | Altai Krai, Gorno-Altai, Artybash                                                     | 51,70 | 87,20  |                                          |
| MM16159 | <i>Elachista dimicatella</i>   | 425     | M | Kullberg, Lievonen                              | 3.-5.6.2003   | Ukraine | Ivano-Frankovsk, Burkyt, Verchovna distr.                                             | 47,90 | 24,73  |                                          |
| MM16160 | <i>Elachista dimicatella</i>   | 658     | M | Kullberg, Lievonen                              | 24.-26.6.2003 | Ukraine | Ivano-Frankovsk, Mt. Chivchen, Verchovna distr.                                       | 47,86 | 24,71  | L. Kaila prep. 4827                      |
| MM16161 | <i>Elachista dimicatella</i>   | 658     | M | Kullberg, Lievonen                              | 24.-26.6.2003 | Ukraine | Ivano-Frankovsk, Mt. Chivchen, Verchovna distr.                                       | 47,86 | 24,71  | L. Kaila prep. 4853                      |
| MM10509 | <i>Elachista elegans</i>       | 658     | M | Esko Saarela                                    | ex larva 2009 | Finland | Tavastia australis, Tampere                                                           | 61,54 | 23,80  | mining early, dark forest                |
| MM10510 | <i>Elachista elegans</i>       | 658     | F | Esko Saarela                                    |               | Finland | Tavastia australis, Tampere                                                           | 61,54 | 23,80  | ex larva 2009, mining early, dark forest |
| MM10511 | <i>Elachista elegans</i>       | 658     | F | Esko Saarela                                    | ex larva 2009 | Finland | Tavastia australis, Tampere                                                           | 61,54 | 23,80  | mining early, dark forest                |
| MM10512 | <i>Elachista elegans</i>       | 658     | M | Esko Saarela                                    | 14-Jul-2009   | Finland | Tavastia australis, Pälkäne                                                           | 61,31 | 26,07  | late flight time, light forest           |
| MM10514 | <i>Elachista elegans</i>       | 658     | M | Leo Sippola                                     | 15-Jul-2009   | Finland | Tavastia australis, Pälkäne                                                           | 61,31 | 26,07  | late flight time, light forest           |
| MM10515 | <i>Elachista elegans</i>       | 658     | M | Leo Sippola                                     | 18-Jul-2009   | Finland | Tavastia australis, Pälkäne                                                           | 61,31 | 26,07  | late flight time, light forest           |

|         |                              |     |   |                                                 |               |         |                                                |       |       |                                              |
|---------|------------------------------|-----|---|-------------------------------------------------|---------------|---------|------------------------------------------------|-------|-------|----------------------------------------------|
| MM21158 | <i>Elachista elegans</i>     | 658 |   | Marko Mutanen, Anttoni Mutanen, Nestori Mutanen | 29.-30.7.2011 | Finland | Savonia australis, Imatra                      | 61,16 | 28,75 |                                              |
| MM23191 | <i>Elachista elegans</i>     | 658 |   | Marko Mutanen                                   | 27-Jul-2005   | Finland | Regio aboensis, Dragsfjärd, Taalintehdas       | 60,02 | 22,43 |                                              |
| MM08409 | <i>Elachista eskoi</i>       | 658 |   | Marko Mutanen                                   | 2003          | Finland | Ostrobothnia borealis pars australis, Kiiminki | 65,07 | 25,73 |                                              |
| MM08410 | <i>Elachista eskoi</i>       | 658 |   | Marko Mutanen                                   | 2003          | Finland | Ostrobothnia borealis pars australis, Kiiminki | 65,07 | 25,73 |                                              |
| MM10428 | <i>Elachista eskoi</i>       | 658 |   | Marko Mutanen                                   | 30-Jun-2005   | Finland | Ostrobothnia borealis pars australis, Oulu     | 64,98 | 25,31 |                                              |
| MM10429 | <i>Elachista eskoi</i>       | 658 |   | Marko Mutanen                                   | 30-Jun-2005   | Finland | Ostrobothnia borealis pars australis, Oulu     | 64,98 | 25,31 |                                              |
| MM10430 | <i>Elachista eskoi</i>       | 658 |   | Marko Mutanen                                   | 3.-4.7.2003   | Finland | Regio kuusamoensis, Kuusamo                    | 66,32 | 29,23 |                                              |
| MM14159 | <i>Elachista eskoi</i>       | 658 |   | Marko Mutanen                                   | 23-Jun-2009   | Finland | Ostrobothnia borealis pars australis, Oulu     | 64,99 | 25,41 |                                              |
| MM14160 | <i>Elachista eskoi</i>       | 658 |   | Marko Mutanen                                   | 23-Jun-2009   | Finland | Ostrobothnia borealis pars australis, Oulu     | 64,99 | 25,41 |                                              |
| MM20025 | <i>Elachista eskoi</i>       | 658 | M | J. Tabell                                       | 16-Jun-2007   | Finland | Kymenlaakso, Karelia australis, Virolahti      | 60,52 | 27,70 |                                              |
| MM20026 | <i>Elachista eskoi</i>       | 658 | M | J. Tabell                                       | 17-Jun-2007   | Finland | Kymenlaakso, Karelia australis, Virolahti      | 60,52 | 27,70 |                                              |
| MM20027 | <i>Elachista eskoi</i>       | 658 | M | J. Tabell                                       | 17-Jun-2007   | Finland | Kymenlaakso, Karelia australis, Virolahti      | 60,52 | 27,70 |                                              |
| MM21208 | <i>Elachista eskoi</i>       | 658 |   | Matti Ahola                                     | 23-Jun-2009   | Finland | Ostrobothnia media, Reisjärvi                  | 63,59 | 23,02 |                                              |
| MM21216 | <i>Elachista eskoi</i>       | 658 | M | Marko Mutanen, Anttoni Mutanen, Nestori Mutanen | 23-Jun-2011   | Finland | Ostrobothnia borealis pars australis, Kiiminki | 65,12 | 25,83 |                                              |
| MM21253 | <i>Elachista eskoi</i>       | 658 |   | Marko Mutanen                                   | 30-Jun-2005   | Finland | Ostrobothnia borealis pars australis, Oulu     | 65,02 | 25,41 |                                              |
| MM00685 | <i>Elachista excelsicola</i> | 612 |   | Tomi Mutanen                                    | 28-Jun-2006   | Finland | Obb, Ranua                                     | 65,88 | 26,34 |                                              |
| MM03441 | <i>Elachista excelsicola</i> | 658 |   | Marko Mutanen                                   | 6.-8.7.2006   | Finland | Lapland, Lapponia enontekiensis, Enontekiö     | 69,00 | 20,74 |                                              |
| MM03983 | <i>Elachista excelsicola</i> | 670 |   | Marko Mutanen                                   | 29-Jun-2006   | Finland | Oba, Kiiminki                                  | 65,07 | 25,73 | gen.studied,<br>identification not confirmed |
| MM04313 | <i>Elachista excelsicola</i> | 612 |   | Petri Hirvonen                                  | 02-Jul-2006   | Finland | Le, Enontekiö                                  | 69,00 | 20,74 |                                              |
| MM05881 | <i>Elachista excelsicola</i> | 658 | F | Erkki M. Laasonen, Leena Laasonen               | 05-Jul-2007   | Finland | Lapponia inarensis, Inari                      | 68,43 | 27,39 |                                              |
| MM05884 | <i>Elachista excelsicola</i> | 612 | M | Erkki M. Laasonen, Leena Laasonen               | 03-Jul-2007   | Finland | Li, Inari                                      | 68,72 | 27,69 |                                              |
| MM05885 | <i>Elachista excelsicola</i> | 658 | M | Erkki M. Laasonen, Leena Laasonen               | 03-Jul-2007   | Finland | Lapponia inarensis, Inari                      | 68,72 | 27,69 |                                              |
| MM05886 | <i>Elachista excelsicola</i> | 658 | F | Erkki M. Laasonen, Leena Laasonen               | 03-Jul-2007   | Finland | Lapponia inarensis, Inari                      | 68,72 | 27,69 |                                              |
| MM05936 | <i>Elachista excelsicola</i> | 658 | M | Erkki M. Laasonen, Leena Laasonen               | 14-Jul-2008   | Finland | Lapponia inarensis, Inari                      | 68,44 | 27,39 |                                              |
| MM05938 | <i>Elachista excelsicola</i> | 658 | M | Erkki M. Laasonen, Leena Laasonen               | 14-Jul-2008   | Finland | Lapponia inarensis, Inari                      | 68,44 | 27,39 |                                              |

|         |                                 |     |   |                                                 |             |         |                                                                             |       |        |                     |
|---------|---------------------------------|-----|---|-------------------------------------------------|-------------|---------|-----------------------------------------------------------------------------|-------|--------|---------------------|
| MM08590 | <i>Elachista excelsicola</i>    | 658 | M | Marko Mutanen                                   | 23-Jun-2008 | Finland | Ostrobothnia borealis pars australis, Kiiminki                              | 65,07 | 25,73  |                     |
| MM10426 | <i>Elachista excelsicola</i>    | 658 |   | Marko Mutanen                                   | 21-Jun-2005 | Finland | Ostrobothnia borealis pars australis, Kiiminki                              | 65,07 | 25,73  |                     |
| MM15562 | <i>Elachista excelsicola</i>    | 658 | M | Marko Mutanen                                   | 08-Jul-1997 | Finland | Regio kuusamoensis, Kuusamo                                                 | 66,32 | 29,23  |                     |
| MM15564 | <i>Elachista excelsicola</i>    | 571 | M | Tomi Mutanen                                    | 21-Jun-1995 | Finland | Ostrobothnia borealis pars borealis, Tornio                                 | 65,86 | 24,37  |                     |
| MM16219 | <i>Elachista excelsicola</i>    | 658 | M | R. Siloaho                                      | 30-Jun-2009 | Finland | Lapponia inarenensis, Saariselkä                                            | 68,39 | 27,24  | GP 4458 JT          |
| MM17655 | <i>Elachista excelsicola</i>    | 658 |   | Jari Kaitila                                    | 20-Jul-2000 | Finland | Lapponia inarenensis, Utsjoki                                               | 69,74 | 27,00  |                     |
| MM17971 | <i>Elachista excelsicola</i>    | 658 |   | Marko Mutanen, Nestori Mutanen, Anttoni Mutanen | year 2010   | Finland | Ostrobothnia borealis pars australis, Kiiminki                              | 65,07 | 25,72  |                     |
| MM18589 | <i>Elachista excelsicola</i>    | 658 |   | Bengt A. Bengtsson                              | 03-Jul-2004 | Sweden  | To, Abisko, Nissunsnakk                                                     | 68,25 | 18,90  |                     |
| MM19855 | <i>Elachista excelsicola</i>    | 658 |   | T. Mutanen                                      | 03-Jul-1995 | Finland | Lapland, Lapponia kemensis pars orientalis, Pelkosenniemi                   | 67,14 | 27,69  |                     |
| MM19893 | <i>Elachista excelsicola</i>    | 658 | F | Erkki Laasonen, Leena Laasonen                  |             | Finland | Lapponia inarenensis, Inari                                                 | 69,80 | 26,29  |                     |
| MM20907 | <i>Elachista excelsicola</i>    | 658 | M | Jalava, Tammaru                                 | 10-Jul-1997 | Russia  | Magadan, Magadanskaya Oblast, nr. Gulu village, biological station, Kontakt | 61,85 | 147,67 | 850                 |
| MM20922 | <i>Elachista excelsicola</i>    | 658 | M | Timo Nupponen, Kari Nupponen                    | 12-Jul-1999 | Russia  | Tyumenskaya, Tjumen district, Polar-Ural, Krasnyi Kamen                     | 66,93 | 65,66  | 200                 |
| MM20923 | <i>Elachista excelsicola</i>    | 658 | M | Timo Nupponen, Kari Nupponen                    | 12-Jul-1999 | Russia  | Tyumenskaya, Tjumen district, Polar-Ural, Krasnyi Kamen                     | 66,93 | 65,66  | 200                 |
| MM20924 | <i>Elachista excelsicola</i>    | 658 | M | Timo Nupponen, Kari Nupponen                    | 10-Jul-1999 | Russia  | Tyumenskaya, Tjumen district, Polar-Ural, Krasnyi Kamen                     | 66,93 | 65,66  | 200                 |
| MM21183 | <i>Elachista excelsicola</i>    | 658 |   | Marko Mutanen, Anttoni Mutanen, Nestori Mutanen | 28-Jun-2011 | Finland | Ostrobothnia kajanensis, Kuhmo                                              | 63,91 | 29,84  |                     |
| MM21202 | <i>Elachista excelsicola</i>    | 658 |   | Marko Mutanen                                   | 27-Jun-2011 | Finland | Regio kuusamoensis, Kuusamo                                                 | 66,36 | 29,60  |                     |
| MM22226 | <i>Elachista excelsicola</i>    | 633 | M | Jalava, Kullberg, Koponen                       | 02-Jul-1994 | Russia  | Polar Ural, Krasnyi Kamen                                                   | 66,55 | 65,10  | 400                 |
| MM22607 | <i>Elachista excelsicola</i>    | 658 | M | J.-P. Kaitila                                   | 12-Jul-2008 | Finland | Lapponia enontekiensis, Enontekiö, Toshkaljoki                              | 69,16 | 21,58  |                     |
| MM22608 | <i>Elachista excelsicola</i>    | 658 | M | J.-P. Kaitila                                   | 11-Jul-2008 | Finland | Lapponia enontekiensis, Enontekiö, Toshkaljoki                              | 69,16 | 21,58  |                     |
| MM16175 | <i>Elachista fuscofrontella</i> | 658 | M | A. Albrecht                                     | 07-Jun-1990 | Estonia | Tartu, Jaervselja, Saki                                                     | 58,31 | 27,29  |                     |
| MM21451 | <i>Elachista fuscofrontella</i> | 658 | M | K. Nupponen                                     | 09-May-2005 | Russia  | Orenburg, South Ural, Pokrovka village 20 km S, Schibendy valley            | 50,68 | 54,45  | 200                 |
| MM20939 | <i>Elachista griseella</i>      | 658 | M | J-P. Kaitila                                    | 27-Apr-2002 | Cyprus  | Kypros, Pano Panagia                                                        | 34,91 | 32,63  | L. Kaila Prep. 3991 |

|         |                            |     |   |                                                                 |               |         |                                                                             |       |          |     |                     |
|---------|----------------------------|-----|---|-----------------------------------------------------------------|---------------|---------|-----------------------------------------------------------------------------|-------|----------|-----|---------------------|
| MM16138 | <i>Elachista herrichii</i> | 658 | M | K. Nupponen                                                     | 20-May-2004   | Russia  | Orenburg, South Ural, Guberlinsky Mts., Orsk 40 km W, near Guberlja village | 51,25 | 58,08    | 340 | L. Kaila prep. 4846 |
| MM16139 | <i>Elachista herrichii</i> | 658 | M | K. Nupponen                                                     | 20-May-2004   | Russia  | Orenburg, South Ural, Guberlinsky Mts., Orsk 40 km W, near Guberlja village | 51,25 | 58,08    | 340 | L. Kaila prep. 4394 |
| MM16141 | <i>Elachista herrichii</i> | 658 | M | Timo Nupponen, Kari Nupponen                                    | 28-May-1998   | Russia  | Chelyabinsk, South Ural, Mednogorsk 20 km S, near Kidriasovo village        | 51,21 | 57,61    | 350 | L. Kaila prep. 3334 |
| MM16142 | <i>Elachista herrichii</i> | 658 | M | K. Nupponen                                                     | 11-May-2005   | Russia  | Orenburg, South Ural, Pokrovka village 20 km S, Schibendy valley            | 50,68 | 54,45    | 200 | L. Kaila prep. 4838 |
| MM16143 | <i>Elachista herrichii</i> | 658 | M | Yu. Budashkin                                                   | 24-Jul-1996   | Ukraine | Krym, Karadagh                                                              | 44,90 | 35,20    |     |                     |
| MM00863 | <i>Elachista humilis</i>   | 658 |   | Marko Mutanen                                                   | 20.-21.6.2006 | Finland | Aland Islands, Kökar                                                        | 59,94 | 20,90    |     |                     |
| MM02663 | <i>Elachista humilis</i>   | 658 |   | Marko Mutanen, Panu Vaelimaeki                                  |               | Finland | Karelia australis, Imatra                                                   | 61,11 | 28,80    |     |                     |
| MM06168 | <i>Elachista humilis</i>   | 658 |   | Marko Mutanen, Tomi Mutanen                                     | 18.-17.6.2007 | Finland | Karelia ladogensis, Parikkala                                               | 61,64 | 29,64    |     |                     |
| MM06171 | <i>Elachista humilis</i>   | 658 |   | Marko Mutanen, Tomi Mutanen                                     | 18.-17.6.2007 | Finland | Karelia ladogensis, Parikkala                                               | 61,64 | 29,64    |     |                     |
| MM06222 | <i>Elachista humilis</i>   | 658 |   | Marko Mutanen                                                   | 19-Jun-2007   | Finland | Karelia australis, Joutseno                                                 | 61,06 | 28,72    |     |                     |
| MM08064 | <i>Elachista humilis</i>   | 658 |   | Marko Mutanen, Panu Vaelimaeki                                  | 3.-17.7.2006  | Finland | Lapponia kemensis pars occidentalis, Kolari                                 | 67,28 | 23,75    |     |                     |
| MM08065 | <i>Elachista humilis</i>   | 658 |   | Marko Mutanen, Panu Vaelimaeki                                  | 3.-17.7.2006  | Finland | Lapponia kemensis pars occidentalis, Kolari                                 | 67,28 | 23,75    |     |                     |
| MM08660 | <i>Elachista humilis</i>   | 658 |   | Marko Mutanen                                                   | 19-Jul-2008   | Finland | Aland Islands, Lemland                                                      | 60,01 | 20,13    |     |                     |
| MM09744 | <i>Elachista humilis</i>   | 649 |   | Marko Mutanen, Meelika Mutanen, Atsalea Mutanen, Sylvia Mutanen | 22-Jul-2008   | Finland | Aland Islands, Eckerö                                                       | 60,28 | 19,58    |     |                     |
| MM09867 | <i>Elachista humilis</i>   | 658 |   | Marko Mutanen                                                   | 17-Jun-2008   | Finland | Karelia australis, Joutseno                                                 | 61,06 | 28,72    |     |                     |
| MM14237 | <i>Elachista humilis</i>   | 658 |   | Marko Mutanen, Nestori Mutanen, Anttoni Mutanen                 | 29-Jun-2009   | Finland | Aland Islands, Eckerö                                                       | 60,24 | 19,59    |     |                     |
| MM14238 | <i>Elachista humilis</i>   | 658 |   | Marko Mutanen, Nestori Mutanen, Anttoni Mutanen                 | 29-Jun-2009   | Finland | Aland Islands, Eckerö                                                       | 60,24 | 19,59    |     |                     |
| MM14460 | <i>Elachista humilis</i>   | 658 |   | Marko Mutanen, Nestori Mutanen, Anttoni Mutanen                 | 09-Jul-2009   | Finland | Ostrobothnia kajanensis, Ristijärvi                                         | 64,39 | 28,20    |     |                     |
| MM15298 | <i>Elachista humilis</i>   | 658 | M | A. Albrecht                                                     | 31-May-1990   | Estonia | Saaremaa, Loopollu                                                          | 58,40 | 41416,00 |     |                     |
| MM15560 | <i>Elachista humilis</i>   | 642 | F | Marko Mutanen                                                   | 11.-12.7.2000 | Finland | Ostrobothnia borealis pars australis, Pudasjärvi                            | 65,70 | 27,65    |     |                     |
| MM16117 | <i>Elachista humilis</i>   | 658 | M | E. Laasonen                                                     | 13.-15.7.2002 | Sweden  | Skane, Lund                                                                 | 55,70 | 13,10    |     |                     |
| MM16118 | <i>Elachista humilis</i>   | 619 | M | E. Laasonen                                                     | 07-Jul-2002   | Sweden  | Skane, Lund                                                                 | 55,70 | 13,10    |     |                     |

|         |                             |         |   |                                   |               |         |                                                     |       |       |                               |
|---------|-----------------------------|---------|---|-----------------------------------|---------------|---------|-----------------------------------------------------|-------|-------|-------------------------------|
| MM17392 | <i>Elachista humilis</i>    | 658     |   | Juhani Itaemies                   | 22-Jun-2003   | Finland | Satakunda, Eurajoki                                 | 61,19 | 21,42 | <i>Deschampsia caespitosa</i> |
| MM17942 | <i>Elachista humilis</i>    | 658     |   | Sami Haapala                      | 22-Jun-2009   | Finland | Savonia australis, Lappeenranta                     | 61,06 | 28,72 |                               |
| MM17943 | <i>Elachista humilis</i>    | 658     |   | Sami Haapala                      | 23-Jun-2009   | Finland | Karelia lagodensis, Parikkala                       | 61,55 | 29,57 |                               |
| MM20239 | <i>Elachista humilis</i>    | 658     | M | J. Tabell                         | 17-Jul-2011   | Austria | Niederlpi                                           | 47,68 | 15,37 |                               |
| MM20921 | <i>Elachista humilis</i>    | 658     | M | K. Nupponen, J. Junnilainen       | 23-Jul-1997   | Poland  | Tatra mnts., Bobrowiec, Mnichy Chocholowskie        | 49,24 | 19,79 | 1450                          |
| MM20928 | <i>Elachista humilis</i>    | 655[3n] | M | K. Nupponen, J. Junnilainen       | 23-Jul-1997   | Poland  | Tatra mnts., Bobrowiec, Mnichy Chocholowskie        | 49,24 | 19,79 | 1450                          |
| MM22597 | <i>Elachista humilis</i>    | 658     | M | J. Kullberg., T. Lievonen         | 25-Aug-2003   | Ukraine | Ivano-Frankovsk, Verkhovyna, Mt. Chiven             | 47,86 | 24,71 | 1675                          |
| MM16147 | <i>Elachista irenae</i>     | 658     | M | K. Nupponen, J. Junnilainen       | 28-Jul-1997   | Poland  | Tatra Mts, Komiński Wierch                          | 49,24 | 19,83 |                               |
| MM16149 | <i>Elachista irenae</i>     | 658     | M | K. Nupponen, J. Junnilainen       | 30-Jul-1997   | Poland  | Tatra Mts, Komiński Wierch                          | 49,24 | 19,83 |                               |
| MM00687 | <i>Elachista kilmunella</i> | 658     |   | Tomi Mutanen                      | 28-Jun-2006   | Finland | Lapland, Ostrobothnia borealis pars borealis, Ranua | 65,88 | 26,34 |                               |
| MM03901 | <i>Elachista kilmunella</i> | 658     |   | Marko Mutanen                     | 27-Jun-2006   | Finland | Ostrobothnia borealis pars australis, Pudasjärvi    | 65,39 | 26,91 |                               |
| MM03902 | <i>Elachista kilmunella</i> | 658     |   | Marko Mutanen                     | 27-Jun-2006   | Finland | Ostrobothnia borealis pars australis, Pudasjärvi    | 65,39 | 26,91 |                               |
| MM04003 | <i>Elachista kilmunella</i> | 658     |   | Marko Mutanen                     | 13.-14.6.2006 | Finland | North Karelia, Karelia borealis, Kesälahti          | 61,79 | 29,71 |                               |
| MM05876 | <i>Elachista kilmunella</i> | 658     | M | Erkki M. Laasonen, Leena Laasonen | 05-Jul-2007   | Finland | Lapponia inarenensis, Inari                         | 68,43 | 27,39 |                               |
| MM05877 | <i>Elachista kilmunella</i> | 658     | F | Erkki M. Laasonen, Leena Laasonen | 05-Jul-2007   | Finland | Lapponia inarenensis, Inari                         | 68,43 | 27,39 |                               |
| MM05878 | <i>Elachista kilmunella</i> | 637     | M | Erkki M. Laasonen, Leena Laasonen | 05-Jul-2007   | Finland | Li, Inari                                           | 68,43 | 27,39 |                               |
| MM05879 | <i>Elachista kilmunella</i> | 613     | F | Erkki M. Laasonen, Leena Laasonen | 05-Jul-2007   | Finland | Li, Inari                                           | 68,43 | 27,39 |                               |
| MM05880 | <i>Elachista kilmunella</i> | 658     | M | Erkki M. Laasonen, Leena Laasonen | 05-Jul-2007   | Finland | Lapponia inarenensis, Inari                         | 68,43 | 27,39 |                               |
| MM05882 | <i>Elachista kilmunella</i> | 670     | M | Erkki M. Laasonen, Leena Laasonen | 03-Jul-2007   | Finland | Li, Inari                                           | 68,72 | 27,69 |                               |
| MM05928 | <i>Elachista kilmunella</i> | 658     | M | Erkki M. Laasonen, Leena Laasonen | 03-Jul-2008   | Finland | Ostrobothnia borealis pars borealis, Kemnmaa        | 65,89 | 24,63 |                               |
| MM05929 | <i>Elachista kilmunella</i> | 658     | M | Erkki M. Laasonen, Leena Laasonen | 03-Jul-2008   | Finland | Ostrobothnia borealis pars borealis, Kemnmaa        | 65,89 | 24,63 |                               |
| MM05930 | <i>Elachista kilmunella</i> | 658     | M | Erkki M. Laasonen, Leena Laasonen | 03-Jul-2008   | Finland | Ostrobothnia borealis pars borealis, Kemnmaa        | 65,89 | 24,63 |                               |
| MM05931 | <i>Elachista kilmunella</i> | 658     | M | Erkki M. Laasonen, Leena Laasonen | 14-Jul-2008   | Finland | Lapponia inarenensis, Inari                         | 68,44 | 27,39 |                               |
| MM05932 | <i>Elachista kilmunella</i> | 658     | M | Erkki M. Laasonen, Leena Laasonen | 14-Jul-2008   | Finland | Lapponia inarenensis, Inari                         | 68,44 | 27,39 |                               |
| MM05935 | <i>Elachista kilmunella</i> | 658     | M | Erkki M. Laasonen, Leena Laasonen | 14-Jul-2008   | Finland | Lapponia inarenensis, Inari                         | 68,44 | 27,39 |                               |

|         |                      |         |   |                                                               |             |         |                                                      |       |       |                        |
|---------|----------------------|---------|---|---------------------------------------------------------------|-------------|---------|------------------------------------------------------|-------|-------|------------------------|
| MM05937 | Elachista kilmunella | 632     | M | Erkki M. Laasonen, Leena Laasonen                             | 14-Jul-2008 | Finland | Laponia inarensis, Inari                             | 68,44 | 27,39 |                        |
| MM06594 | Elachista kilmunella | 658     | M | Tomi Mutanen, Marko Mutanen, Nestori Mutanen, Anttoni Mutanen | 6.-7.7.2007 | Finland | Karelia borealis, Ilomantsi                          | 62,51 | 30,88 |                        |
| MM09242 | Elachista kilmunella | 658     | M | Petri Hirvonen                                                | 07-Jul-2009 | Finland | Regio kuusamoensis, Kuusamo                          | 66,14 | 23,90 |                        |
| MM09251 | Elachista kilmunella | 658     | M | Petri Hirvonen                                                | 07-Jul-2009 | Finland | Regio kuusamoensis, Kuusamo                          | 66,14 | 23,90 |                        |
| MM15563 | Elachista kilmunella | 658     | M | Marko Mutanen                                                 | 24-Jun-2004 | Finland | Ostrobothnia borealis pars australis, Kiiminki       | 65,07 | 25,73 |                        |
| MM16190 | Elachista kilmunella | 658     | M | Jalava, Kullberg, Koponen                                     | 08-Jul-1994 | Russia  | Polar Ural, Krasnyi Kamen                            | 66,08 | 65,17 | L. Kaila prep. 2091    |
| MM16207 | Elachista kilmunella | 658     | M | J. Tabell                                                     | 18-Jun-2006 | Finland | Tavastia australis, Hartola                          | 61,59 | 26,02 | GP 4253 JT             |
| MM16208 | Elachista kilmunella | 658     | M | J. Tabell                                                     | 30-Jun-2006 | Finland | Tavastia australis, Hartola                          | 61,59 | 26,02 | GP 3907 JT             |
| MM17963 | Elachista kilmunella | 658     |   | family Marko Mutanen                                          | 30-Jun-2010 | Finland | Ostrobothnia kajanensis, Kuhmo                       | 63,91 | 29,83 |                        |
| MM18579 | Elachista kilmunella | 658     |   | Ingvar Svensson                                               | 01-Jul-2002 | Sweden  | Jaemtland, Storlidfjaellet                           | 64,77 | 13,93 |                        |
| MM18580 | Elachista kilmunella | 658     |   | Ingvar Svensson                                               | 01-Jul-2002 | Sweden  | Jaemtland, Storlidfjaellet                           | 64,77 | 13,93 |                        |
| MM19892 | Elachista kilmunella | 658     | M | Erkki Laasonen, Leena Laasonen                                |             | Finland | Lapland, Laponia inarensis, Utsjoki                  | 69,81 | 27,17 |                        |
| MM20004 | Elachista kilmunella | 658     | M | J. Tabell                                                     | 17-Jun-2006 | Finland | Tavastia australis, Hartola                          | 61,60 | 26,03 | GP 3908 JT             |
| MM20005 | Elachista kilmunella | 658     | M | J. Tabell                                                     | 12-Jun-2009 | Finland | Tavastia australis, Hartola                          | 61,60 | 26,03 |                        |
| MM21201 | Elachista kilmunella | 657[1n] |   | Marko Mutanen                                                 | 27-Jun-2011 | Finland | Regio kuusamoensis, Kuusamo                          | 66,36 | 29,60 |                        |
| MM21337 | Elachista kilmunella | 658     | M | J. Junnilainen                                                | 01-Jul-2008 | Finland | Kuusamo                                              | 66,40 | 29,40 |                        |
| MM14194 | Elachista krogeri    | 658     |   | Panu Vaelimaeki                                               | 22-Jun-2009 | Finland | Ostrobothnia borealis pars australis, Oulu           | 64,94 | 25,46 |                        |
| MM14195 | Elachista krogeri    | 658     |   | Panu Vaelimaeki                                               | 22-Jun-2009 | Finland | Ostrobothnia borealis pars australis, Oulu           | 64,94 | 25,46 |                        |
| MM14196 | Elachista krogeri    | 623     |   | Panu Vaelimaeki                                               | 22-Jun-2009 | Finland | Ostrobothnia borealis pars australis, Oulu           | 64,94 | 25,46 |                        |
| MM14202 | Elachista krogeri    | 658     |   | MarkoMutanen                                                  | 24-Jun-2009 | Finland | Ostrobothnia borealis pars australis, Oulu           | 64,94 | 25,46 |                        |
| MM14203 | Elachista krogeri    | 658     |   | MarkoMutanen                                                  | 24-Jun-2009 | Finland | Ostrobothnia borealis pars australis, Oulu           | 64,94 | 25,46 |                        |
| MM14204 | Elachista krogeri    | 658     |   | MarkoMutanen                                                  | 24-Jun-2009 | Finland | Ostrobothnia borealis pars australis, Oulu           | 64,94 | 25,46 |                        |
| MM16155 | Elachista krogeri    | 658     | M | Jalava, Kullberg, Koponen                                     | 12-Jul-1994 | Russia  | Ob Delta, Labytnangi                                 | 66,70 | 66,58 | L. Kaila prep. 1368    |
| MM16157 | Elachista krogeri    | 658     | M | Jalava, Kullberg, Koponen                                     | 12-Jul-1994 | Russia  | Ob Delta, Labytnangi                                 | 66,70 | 66,58 | L. Kaila prep. 1205    |
| MM16158 | Elachista krogeri    | 658     | M | Jalava, Kullberg, Koponen                                     | 07-Jul-1994 | Russia  | Ob Delta, Labytnangi                                 | 66,70 | 66,58 | L. Kaila prep. 1206    |
| MM20920 | Elachista krogeri    | 654     | M | Timo Nupponen, Kari Nupponen                                  | 14-Jul-1999 | Russia  | Tyumenskaya, Tjumen district, Polar-Ural, Labytnangi | 66,66 | 65,66 | 50 L. Kaila Prep. 3631 |

|                     |                                  |         |   |                                                                 |                 |         |                                                      |       |       |     |                               |
|---------------------|----------------------------------|---------|---|-----------------------------------------------------------------|-----------------|---------|------------------------------------------------------|-------|-------|-----|-------------------------------|
| MM20926             | <i>Elachista krogeri</i>         | 595[1n] | M | Timo Nupponen, Kari Nupponen                                    | 14-Jul-1999     | Russia  | Tyumenskaya, Tjumen district, Polar-Ural, Labytnangi | 66,66 | 65,66 | 50  |                               |
| MM20927             | <i>Elachista krogeri</i>         | 596[2n] | M | Timo Nupponen, Kari Nupponen                                    | 14-Jul-1999     | Russia  | Tyumenskaya, Tjumen district, Polar-Ural, Labytnangi | 66,66 | 65,66 | 50  |                               |
| BC ZSM<br>Lep 53220 | <i>Elachista lastrella</i>       | 658     | F | Dr. Theo Gruenewald                                             | 22-May-2010     | Germany | Bavaria, Oberpfalz, Regensburg, Nittendorf           | 49,03 | 11,96 | 400 |                               |
| MM03980             | <i>Elachista leifi</i>           | 658     |   | Marko Mutanen                                                   | 29-Jun-2006     | Finland | Ostrobothnia borealis pars australis, Pudasjärvi     | 65,39 | 26,91 |     |                               |
| MM05943             | <i>Elachista leifi</i>           | 619     | F | Erkki M. Laasonen, Leena Laasonen                               | 14-Jul-2008     | Finland | Lapponia inarensis, Inari                            | 68,95 | 28,46 |     |                               |
| MM10425             | <i>Elachista leifi</i>           | 658     |   | Marko Mutanen                                                   | 30-Jun-2000     | Finland | Ostrobothnia borealis pars australis, Pudasjärvi     | 65,70 | 27,65 |     |                               |
| MM16249             | <i>Elachista leifi</i>           | 658     | M | J. Tabell                                                       | 01-Jul-2009     | Finland | Ostrobothnia borealis pars australis, Rovaniemi      | 66,45 | 25,66 |     | GP 4355 JT                    |
| MM18150             | <i>Elachista leifi</i>           | 658     |   | Marko Mutanen                                                   | 03-Jul-1995     | Finland | Lapponia kemensis pars orientalis, Pelkosenniemi     | 67,19 | 27,88 |     | Gen. prep. no. 533 M. Mutanen |
| MM06643             | <i>Elachista luticomella</i>     | 658     | M | Marko Mutanen                                                   | 11-Jul-2007     | Finland | Nylandia, Kirkkonummi                                | 59,98 | 24,44 |     |                               |
| MM06782             | <i>Elachista luticomella</i>     | 658     | M | Marko Mutanen                                                   | 13-Jul-2007     | Finland | Aland Islands, Maarianhamina                         | 60,10 | 19,93 |     |                               |
| MM06797             | <i>Elachista luticomella</i>     | 658     |   | Marko Mutanen                                                   | 14-Jul-2007     | Finland | Aland Islands, Sund                                  | 60,23 | 20,06 |     |                               |
| MM08652             | <i>Elachista luticomella</i>     | 658     |   | Marko Mutanen                                                   | 18-Jul-2008     | Finland | Aland Islands, Hammarland                            | 60,23 | 19,69 |     |                               |
| MM09725             | <i>Elachista luticomella</i>     | 658     |   | Marko Mutanen, Meelika Mutanen, Atsalea Mutanen, Sylvia Mutanen | 21-Jul-2008     | Finland | Aland Islands, Geta                                  | 60,36 | 19,91 |     |                               |
| MM20042             | <i>Elachista luticomella</i>     | 658     | M | J. Tabell                                                       | 09-Jun-2008     | Estonia | Saaremaa, Vasalemma                                  | 59,24 | 24,28 |     |                               |
| MM00861             | <i>Elachista maculicerusella</i> | 658     |   | Marko Mutanen                                                   | 20.-21.6.2006   | Finland | Aland Islands, Kökar                                 | 59,94 | 20,90 |     |                               |
| MM02647             | <i>Elachista maculicerusella</i> | 658     |   | Marko Mutanen, Panu Vaelimaeki                                  | 2006            | Finland | Savonia australis, Imatra                            | 61,11 | 28,80 |     | genitalia examined            |
| MM02648             | <i>Elachista maculicerusella</i> | 634     |   | Marko Mutanen, Panu Vaelimaeki                                  | 2006            | Finland | Savonia australis, Imatra                            | 61,11 | 28,80 |     |                               |
| MM03985             | <i>Elachista maculicerusella</i> | 658     |   | Marko Mutanen                                                   | 02-Aug-2006     | Finland | Kymenlaakso, Karelia australis, Kotka                | 60,41 | 26,82 |     |                               |
| MM03986             | <i>Elachista maculicerusella</i> | 658     |   | Marko Mutanen                                                   | 01-Aug-2006     | Finland | Nylandia, Kirkkonummi                                | 59,98 | 24,44 |     |                               |
| MM09733             | <i>Elachista maculicerusella</i> | 658     |   | Marko Mutanen, Meelika Mutanen, Atsalea Mutanen, Sylvia Mutanen | 21-Jul-2008     | Finland | Aland Islands, Geta                                  | 60,36 | 19,91 |     |                               |
| MM12025             | <i>Elachista maculicerusella</i> | 658     |   | Marko Mutanen, Panu Vaelimaeki                                  | 2007            | Finland | Nylandia, Hanko                                      | 59,84 | 23,24 |     |                               |
| MM14357             | <i>Elachista maculicerusella</i> | 658     |   | Marko Mutanen                                                   | 01-Jul-2009     | Finland | Aland Islands, Sund                                  | 60,18 | 20,23 |     |                               |
| MM15439             | <i>Elachista maculicerusella</i> | 658     |   | B. Wikstrom                                                     | 15.-16-May-2002 | Russia  | Moskovskaya, Moscow oblast, Stupino region           | 55,20 | 37,90 |     |                               |



|         |                                  |     |   |                          |                          |            |                                                  |       |          |                                              |
|---------|----------------------------------|-----|---|--------------------------|--------------------------|------------|--------------------------------------------------|-------|----------|----------------------------------------------|
| MM15440 | <i>Elachista maculicerusella</i> | 658 |   | B. Wikstrom              | 15.-16-May-2002          | Russia     | Moskovskaya, Moscow oblast, Stupino region       | 55,20 | 37,90    |                                              |
| MM15441 | <i>Elachista maculicerusella</i> | 658 |   | B. Wikstrom              | 15.-16-May-2002          | Russia     | Moskovskaya, Moscow oblast, Stupino region       | 55,20 | 37,90    |                                              |
| MM15442 | <i>Elachista maculicerusella</i> | 658 |   | A. Albrecht              | 03-Jun-1990              | Estonia    | Paernu r., Nigula                                | 58,30 | 24,40    |                                              |
| MM15443 | <i>Elachista maculicerusella</i> | 658 |   | A. Albrecht              | 03-Jun-1990              | Estonia    | Paernu r., Nigula                                | 58,30 | 24,40    |                                              |
| MM15444 | <i>Elachista maculicerusella</i> | 658 |   | M. Kozlov                | 25-Jul-1991              | Russia     | Murmansk, Murmansk, Luvenga, White sea cost      | 67,10 | 32,71    |                                              |
| MM15445 | <i>Elachista maculicerusella</i> | 658 |   | M. Kozlov                | 25-Jul-1991              | Russia     | Murmansk, Murmansk, Luvenga, White sea cost      | 67,10 | 32,71    |                                              |
| MM15448 | <i>Elachista maculicerusella</i> | 658 |   | L. Kaila                 | 01-Jul-1990              | Kazakhstan | Zailiskiy Alatau, Alma-Atinskij Nat.P.           | 43,08 | 77,25    |                                              |
| MM15449 | <i>Elachista maculicerusella</i> | 658 |   | L. Kaila                 | 01-Jul-1990              | Kazakhstan | Zailiskiy Alatau, Alma-Atinskij Nat.P.           | 43,08 | 77,25    | L. Kaila prep. 351                           |
| MM16230 | <i>Elachista maculicerusella</i> | 658 | F | J. Tabell                | ex larva em. 7-Jun-2008  | Finland    | Tavastia australis, Hartola                      | 61,59 | 26,02    | Calamagrostis epigejos 27.V.2008             |
| MM16231 | <i>Elachista maculicerusella</i> | 658 | M | P. Varalda               | ex larva em. 3-Apr-2007  | Italy      | Piedmont, Morano sul Po                          | 45,16 | 8,36     | Phalaris arundinacea 19.III.2007             |
| MM16232 | <i>Elachista maculicerusella</i> | 658 | M | J. Tabell                | 07-Jun-2009              | Finland    | Tavastia australis, Sysmä                        | 61,54 | 25,93    |                                              |
| MM16233 | <i>Elachista maculicerusella</i> | 658 | F | P. Varalda               | ex larva em. 3-Apr-2007, | Italy      | Piedmont, Morano sul Po                          | 45,16 | 8,36     | Phalaris arundinacea 19.III.2007, GP 4251 JT |
| MM16980 | <i>Elachista maculicerusella</i> | 658 | M | J. Junnilainen           | 02-Jun-2008              | Croatia    | Jartsebarsko                                     | 45,67 | 15,65    |                                              |
| MM17940 | <i>Elachista maculicerusella</i> | 658 |   | Sami Haapala             | 02-Jun-2009              | Finland    | Savonia australis, Imatra                        | 61,14 | 28,76    |                                              |
| MM19518 | <i>Elachista maculicerusella</i> | 307 |   | H. Hendriksen            | 09-Aug-2004              | Denmark    | Nez, Sjaelland, Kulhuse                          | 55,92 | 11,91    |                                              |
| MM21343 | <i>Elachista maculicerusella</i> | 658 | M | J. Junnilainen           | 02-Jun-2008              | Croatia    | Jartsebarsko                                     | 45,67 | 15,65    |                                              |
| MM21425 | <i>Elachista maculosella</i>     | 658 | F | J. Nel                   | 26-Apr-2003              | France     | Brusquires de Cassis                             | 43,20 | 41399,00 |                                              |
| MM15561 | <i>Elachista nielswolffi</i>     | 571 | M | Marko Mutanen            | 11.-12.7.2000            | Finland    | Ostrobothnia borealis pars australis, Pudasjärvi | 65,70 | 27,65    |                                              |
| MM16224 | <i>Elachista nielswolffi</i>     | 658 | M | J. Tabell                | 01-Jul-2009              | Finland    | Kainuu, Ostrobothnia kajanensis, Puolanka        | 64,65 | 28,02    |                                              |
| MM16225 | <i>Elachista nielswolffi</i>     | 658 | F | J. Tabell                | ex larva em. 3-Jul-2008  | Finland    | Kainuu, Ostrobothnia kajanensis, Puolanka        | 64,65 | 28,05    | Deschampsia flexuosa 24.VI.2008, GP 4429 JT  |
| MM16226 | <i>Elachista nielswolffi</i>     | 658 | M | J. Tabell                | 01-Jul-2009              | Finland    | Kainuu, Ostrobothnia kajanensis, Puolanka        | 64,65 | 28,02    |                                              |
| MM17553 | <i>Elachista nielswolffi</i>     | 658 |   | Marko Mutanen            | 11.-12.7.2000            | Finland    | Ostrobothnia borealis pars australis, Pudasjärvi | 65,70 | 27,65    |                                              |
| MM18151 | <i>Elachista nielswolffi</i>     | 658 |   | Marko Mutanen            | 11.-12.7.2000            | Finland    | Ostrobothnia borealis pars australis, Pudasjärvi | 65,70 | 27,65    |                                              |
| MM20883 | <i>Elachista nielswolffi</i>     | 407 | M | T. Nupponen, K. Nupponen | 24-Jun-2000              | Russia     | Altai Krai, Altai Mts., Sarlyk region            | 51,00 | 85,58    | 1450                                         |
| MM20885 | <i>Elachista nielswolffi</i>     | 658 | M | T. Nupponen, K. Nupponen | 24-Jun-2000              | Russia     | Altai Krai, Altai Mts., Sarlyk region            | 51,00 | 85,58    | 1450                                         |
| MM20888 | <i>Elachista nielswolffi</i>     | 658 | M | T. Nupponen, K. Nupponen | 24-Jun-2000              | Russia     | Altai Krai, Altai Mts., Sarlyk region            | 51,00 | 85,58    | 1450                                         |

|         |                            |         |   |                                                 |               |         |                                                                             |       |       |                     |
|---------|----------------------------|---------|---|-------------------------------------------------|---------------|---------|-----------------------------------------------------------------------------|-------|-------|---------------------|
| MM06159 | <i>Elachista nobilella</i> | 658     |   | Marko Mutanen, Tomi Mutanen                     | 18.-17.6.2007 | Finland | Karelia ladogensis, Parikkala                                               | 61,64 | 29,64 |                     |
| MM06160 | <i>Elachista nobilella</i> | 626[1n] |   | Marko Mutanen, Tomi Mutanen                     | 18.-17.6.2007 | Finland | Karelia ladogensis, Parikkala                                               | 61,64 | 29,64 |                     |
| MM06267 | <i>Elachista nobilella</i> | 658     | M | Marko Mutanen, Nestori Mutanen, Anttoni Mutanen | 22.-23.6.2007 | Finland | Ostrobothnia borealis pars australis, Kiiminki                              | 65,07 | 25,73 |                     |
| MM08381 | <i>Elachista nobilella</i> | 658     |   | Marko Mutanen, Panu Vaelimaeki                  | 17.-18.6.2005 | Finland | Tavastia australis, Loppi                                                   | 60,65 | 24,08 |                     |
| MM17962 | <i>Elachista nobilella</i> | 658     |   | Marko Mutanen, Nestori Mutanen, Anttoni Mutanen | 19-Jun-2010   | Finland | Karelia borealis, Kitee                                                     | 62,08 | 29,95 |                     |
| MM20033 | <i>Elachista nobilella</i> | 658     | M | J. Tabell                                       | 01-Jul-2009   | Finland | Kainuu, Ostrobothnia kajanensis, Puolanka                                   | 64,65 | 28,04 |                     |
| MM20034 | <i>Elachista nobilella</i> | 658     | M | J. Tabell                                       | 13-May-2007   | Finland | Tavastia australis, Hartola                                                 | 61,44 | 25,98 |                     |
| MM16133 | <i>Elachista orstadii</i>  | 658     | M | J. Jalava, J. Kullberg                          | 17-Jun-1995   | Russia  | Tyva, Tannu-Ola Mts                                                         | 50,83 | 94,32 | L. Kaila prep. 1836 |
| MM16136 | <i>Elachista orstadii</i>  | 658     | M | O. Bidzilya                                     | 15-Jul-1995   | Russia  | Altai Krai, Ukok Plateau                                                    | 49,30 | 87,50 |                     |
| MM16137 | <i>Elachista orstadii</i>  | 656     | M | O. Bidzilya                                     | 18-Jun-1995   | Russia  | Altai Krai, Ukok Plateau                                                    | 49,30 | 87,50 |                     |
| MM18552 | <i>Elachista orstadii</i>  | 658     |   | Ingvar Svensson                                 | 15-May-1996   | Sweden  | Oeg, Heda                                                                   | 58,28 | 14,69 |                     |
| MM18553 | <i>Elachista orstadii</i>  | 658     |   | Ingvar Svensson                                 | 02-Jun-1994   | Sweden  | Oel, Gardby                                                                 | 56,59 | 16,64 |                     |
| MM18586 | <i>Elachista orstadii</i>  | 658     |   | Bengt A. Bengtsson                              | 20-May-2010   | Sweden  | Sm, Hoegsby, Valakra                                                        | 57,20 | 15,98 |                     |
| MM18593 | <i>Elachista orstadii</i>  | 658     |   | Bengt A. Bengtsson                              | 05-Jun-2004   | Sweden  | Oel, Gardby                                                                 | 56,59 | 16,64 |                     |
| MM20879 | <i>Elachista orstadii</i>  | 658     | M | T. Nupponen, K. Nupponen                        | 27-Jun-2000   | Russia  | Altai Krai, Altai Mts., Kuraisky hrebet                                     | 50,30 | 87,88 | 2750                |
| MM20882 | <i>Elachista orstadii</i>  | 658     | M | T. Nupponen, K. Nupponen                        | 27-Jun-2000   | Russia  | Altai Krai, Altai Mts., Kuraisky hrebet                                     | 50,30 | 87,88 | 2750                |
| MM20884 | <i>Elachista orstadii</i>  | 658     | F | T. Nupponen, K. Nupponen                        | 27-Jun-2000   | Russia  | Altai Krai, Altai Mts., Kuraisky hrebet                                     | 50,30 | 87,88 | 2750                |
| MM20900 | <i>Elachista orstadii</i>  | 658     | M | K. Nupponen                                     | 20-May-2004   | Russia  | Orenburg, South Ural, Guberlinsky Mts., Orsk 40 km W, near Guberlja village | 51,25 | 58,08 | 340                 |
| MM20901 | <i>Elachista orstadii</i>  | 379     | F | K. Nupponen                                     | 20-May-2004   | Russia  | Orenburg, South Ural, Guberlinsky Mts., Orsk 40 km W, near Guberlja village | 51,25 | 58,08 | 340                 |
| MM20906 | <i>Elachista orstadii</i>  | 658     | M | K. Nupponen                                     | 20-May-2004   | Russia  | Orenburg, South Ural, Guberlinsky Mts., Orsk 40 km W, near Guberlja village | 51,25 | 58,08 | 340                 |
| MM20970 | <i>Elachista orstadii</i>  | 307     | M | Timo Nupponen, Kari Nupponen                    | 04-Jul-2000   | Russia  | Altai Krai, Altai mnts., Kuraisky hrebet                                    | 50,27 | 87,83 | 2500                |
| MM21452 | <i>Elachista orstadii</i>  | 658     | M | O. Karsholt                                     | 27-May-1994   | Greece  | Epirus, Ipiros, S. Metsova                                                  | 39,75 | 21,19 | 1550                |
| MM21453 | <i>Elachista orstadii</i>  | 658     | M | O. Karsholt                                     | 27-May-1994   | Greece  | Epirus, Ipiros, S. Metsova                                                  | 39,75 | 21,19 | 1550                |
| MM21454 | <i>Elachista orstadii</i>  | 658     | M | O. Karsholt                                     | 27-May-1994   | Greece  | Epirus, Ipiros, S. Metsova                                                  | 39,75 | 21,19 | 1550                |
| MM15558 | <i>Elachista poae</i>      | 658     | M | Marko Mutanen                                   | 21-Jun-2004   | Finland | Nylandia, Karjaa                                                            | 60,19 | 23,75 |                     |

|         |                              |         |   |                                                    |                       |         |                                                    |       |            |                                       |
|---------|------------------------------|---------|---|----------------------------------------------------|-----------------------|---------|----------------------------------------------------|-------|------------|---------------------------------------|
| MM15559 | <i>Elachista poae</i>        | 658     | F | Marko Mutanen                                      | 21-Jun-2004           | Finland | Nylandia, Karjaa                                   | 60,19 | 23,75      |                                       |
| MM16313 | <i>Elachista poae</i>        | 658     | M | J. Tabell                                          | ex pupa<br>18.6.2008  | Finland | Tavastia australis, Heinola                        | 61,20 | 26,01      | Glyceria maxima<br>12.VI.2008         |
| MM02664 | <i>Elachista pomerana</i>    | 658     |   | Marko Mutanen, Panu Vaelimaeki                     |                       | Finland | Karelia australis, Imatra                          | 61,11 | 28,80      |                                       |
| MM02665 | <i>Elachista pomerana</i>    | 651     |   | Marko Mutanen, Panu Vaelimaeki                     |                       | Finland | Karelia australis, Imatra                          | 61,11 | 28,80      |                                       |
| MM02666 | <i>Elachista pomerana</i>    | 658     |   | Marko Mutanen, Panu Vaelimaeki                     | 2006                  | Finland | Savonia australis, Imatra                          | 61,11 | 28,80      |                                       |
| MM08066 | <i>Elachista pomerana</i>    | 658     |   | Marko Mutanen, Panu Vaelimaeki                     | 3.-17.7.2006          | Finland | Lapponia kemensis pars occidentalis,<br>Kolari     | 67,28 | 23,75      |                                       |
| MM08634 | <i>Elachista pomerana</i>    | 658     | M | Marko Mutanen                                      | 18-Jul-2008           | Finland | Aland Islands, Eckerö                              | 60,28 | 19,58      |                                       |
| MM08635 | <i>Elachista pomerana</i>    | 658     | M | Marko Mutanen                                      | 18-Jul-2008           | Finland | Aland Islands, Eckerö                              | 60,28 | 19,58      |                                       |
| MM08636 | <i>Elachista pomerana</i>    | 658     | M | Marko Mutanen                                      | 18-Jul-2008           | Finland | Aland Islands, Eckerö                              | 60,28 | 19,58      |                                       |
| MM10299 | <i>Elachista pomerana</i>    | 638     |   | Marko Mutanen                                      | ex larva June<br>2008 | Finland | Ostrobothnia borealis pars australis,<br>Kiiminki  | 65,07 | 25,73      | larva on<br>Calamagrostis<br>purpurea |
| MM12474 | <i>Elachista pomerana</i>    | 658     |   | Marko Mutanen, Panu Vaelimaeki                     | 2007                  | Finland | Savonia australis, Imatra                          | 61,11 | 28,80      |                                       |
| MM12478 | <i>Elachista pomerana</i>    | 658     |   | Marko Mutanen, Panu Vaelimaeki                     | 2007                  | Finland | Savonia australis, Imatra                          | 61,11 | 28,80      |                                       |
| MM12479 | <i>Elachista pomerana</i>    | 658     |   | Marko Mutanen, Panu Vaelimaeki                     | 2007                  | Finland | Savonia australis, Imatra                          | 61,11 | 28,80      |                                       |
| MM12480 | <i>Elachista pomerana</i>    | 658     |   | Marko Mutanen, Panu Vaelimaeki                     | 2007                  | Finland | Savonia australis, Imatra                          | 61,11 | 28,80      |                                       |
| MM12481 | <i>Elachista pomerana</i>    | 658     |   | Marko Mutanen, Panu Vaelimaeki                     | 2007                  | Finland | Savonia australis, Imatra                          | 61,11 | 28,80      |                                       |
| MM13866 | <i>Elachista pomerana</i>    | 427     |   | M. Mutanen                                         |                       | Finland | Lapland, Tornio                                    | 65,90 | 24,45      |                                       |
| MM13867 | <i>Elachista pomerana</i>    | 658     |   | M. Mutanen                                         |                       | Finland | Lapland, Tornio                                    | 65,90 | 24,45      |                                       |
| MM14239 | <i>Elachista pomerana</i>    | 658     |   | Marko Mutanen, Nestori Mutanen,<br>Anttoni Mutanen | 29-Jun-2009           | Finland | Aland Islands, Eckerö                              | 60,24 | 19,59      |                                       |
| MM14642 | <i>Elachista pomerana</i>    | 658     |   | Marko Mutanen, Nestori Mutanen,<br>Anttoni Mutanen | 27-Jul-2009           | Finland | Ostrobothnia borealis pars australis,<br>Kiiminki  | 65,07 | 25,73      |                                       |
| MM16007 | <i>Elachista pomerana</i>    | 658     |   | Vesa Lepistoe, Kari Vaalamo                        | 02-Jun-2006           | Finland | Nylandia, Sipoo                                    | 60,22 | 25,38      |                                       |
| MM20014 | <i>Elachista pomerana</i>    | 657[1n] | F | J. Tabell                                          | 02-Jul-2008           | Finland | Tavastia australis, Hartola                        | 61,57 | 26,05      |                                       |
| MM20909 | <i>Elachista pomerana</i>    | 658     | M | Jalava, Kullberg                                   | 13-Jul-1996           | Russia  | Buryatiya, Buryatia, Svyatov Nos pns.,<br>Monahovo | 53,67 | 109,0<br>0 | 460                                   |
| MM18885 | <i>Elachista rufocinerea</i> | 658     |   | P. Faiallo                                         | 04-May-1995           | Italy   | Liguria, Passo Turchino                            | 44,48 | 8,73       |                                       |
| MM19517 | <i>Elachista rufocinerea</i> | 223     |   | H. Hendriksen                                      | 03-May-1995           | Denmark | Jylland, Hald ege                                  | 56,44 | 9,40       |                                       |
| MM21348 | <i>Elachista rufocinerea</i> | 658     | M | L. Srnka                                           | 22-Mar-2001           | Croatia | Zaostrog                                           | 43,14 | 17,27      |                                       |
| MM15299 | <i>Elachista subnigrella</i> | 658     | M | A. Albrecht                                        | 02-Jun-1990           | Estonia | Saaremaa, Mustjala                                 | 58,46 | 22,23      |                                       |
| MM16131 | <i>Elachista subnigrella</i> | 554     | M | J. Bjorklund                                       | 14-Jun-1994           | Sweden  | Upland, Sollentuna                                 | 59,43 | 17,93      |                                       |
| MM16132 | <i>Elachista subnigrella</i> | 658     | M | J. Bjorklund                                       | 14-Jun-1994           | Sweden  | Upland, Sollentuna                                 | 59,43 | 17,93      |                                       |

|                   |                              |     |   |                                |                             |            |                                                                               |       |            |      |                     |
|-------------------|------------------------------|-----|---|--------------------------------|-----------------------------|------------|-------------------------------------------------------------------------------|-------|------------|------|---------------------|
| MM16245           | <i>Elachista subnigrella</i> | 658 | M | J. Tabell                      | ex larva em.<br>26-Jun-2005 | Austria    | Villach                                                                       | 46,61 | 13,85      |      | GP 4515 L. Kaila    |
| MM18550           | <i>Elachista subnigrella</i> | 658 |   | Ingvar Svensson                | 03-Jun-2004                 | Sweden     | Oel, Sandvik                                                                  | 57,07 | 16,86      |      |                     |
| MM18551           | <i>Elachista subnigrella</i> | 658 |   | Ingvar Svensson                | 17-Jun-1997                 | Sweden     | Oeg, Styra                                                                    | 58,40 | 15,00      |      |                     |
| MM19866           | <i>Elachista subnigrella</i> | 658 |   | Ingvar Svensson                | 01-Jun-2004                 | Sweden     | Oland, Lilla Horn                                                             | 57,08 | 16,90      |      |                     |
| MM21429           | <i>Elachista talgarella</i>  | 658 | M | L. Kaila                       | 07-Aug-1990                 | Kazakhstan | Almaty, Transili Alatau, , Almaty Nat. Pk.                                    | 43,50 | 77,15      | 3000 | paratype            |
| MM21430           | <i>Elachista talgarella</i>  | 540 | M | L. Kaila                       | 07-Aug-1990                 | Kazakhstan | Almaty, Transili Alatau, , Almaty Nat. Pk.                                    | 43,50 | 77,15      | 3000 | paratype            |
| MM16154           | <i>Elachista tanaella</i>    | 658 | M | L. Aarvik                      | 15-Jul-2002                 | Norway     | Fn, Tana Faccabaeljakka                                                       | 70,30 | 28,20      |      | paratype            |
| TLMF Lep<br>04548 | <i>Elachista wieseriella</i> | 658 |   | Huemer P.& Erlebach S.& Wieser | 12-Jun-1999                 | Austria    | Karnten, Auf der Mussen SE/ St.Jakob im Lesachtal N                           | 46,71 | 12,94      | 1700 |                     |
| TLMF Lep<br>06858 | <i>Elachista wieseriella</i> | 658 |   | Deutsch H.                     | 27-Jul-2005                 | Austria    | Tirol, Osttirol, Koednitztal, Greiwiesen E/ Kals am Grossglockner             | 47,02 | 12,68      | 2100 |                     |
| MM06515           | <i>Elachista vonschantzi</i> | 643 | F | Marko Mutanen, Nestori Mutanen | 03-Jul-2007                 | Finland    | Ostrobotnia borealis pars australis,<br>Hailuoto                              | 65,05 | 24,88      |      |                     |
| MM06516           | <i>Elachista vonschantzi</i> | 658 | F | Marko Mutanen, Nestori Mutanen | 03-Jul-2007                 | Finland    | Ostrobotnia borealis pars australis,<br>Hailuoto                              | 65,05 | 24,88      |      |                     |
| MM08614           | <i>Elachista vonschantzi</i> | 658 | M | Marko Mutanen                  | 30-Jun-2008                 | Finland    | Ostrobotnia borealis pars australis,<br>Hailuoto                              | 65,05 | 24,88      |      |                     |
| MM08615           | <i>Elachista vonschantzi</i> | 637 | M | Marko Mutanen                  | 30-Jun-2008                 | Finland    | Ostrobotnia borealis pars australis,<br>Hailuoto                              | 65,05 | 24,88      |      |                     |
| MM14167           | <i>Elachista vonschantzi</i> | 658 |   | Marko Mutanen                  | 24-Jun-2009                 | Finland    | Ostrobotnia borealis pars australis,<br>Hailuoto                              | 65,03 | 24,88      |      |                     |
| MM14168           | <i>Elachista vonschantzi</i> | 658 |   | Marko Mutanen                  | 24-Jun-2009                 | Finland    | Ostrobotnia borealis pars australis,<br>Hailuoto                              | 65,03 | 24,88      |      |                     |
| MM16121           | <i>Elachista zernyi</i>      | 658 | M | J. Jalava, J. Kullberg         | 20.-22.6.1995               | Russia     | W-Sajan Mts., Krasnojarsk Reg.                                                | 52,78 | 93,30      |      | L. Kaila prep. 1837 |
| MM16122           | <i>Elachista zernyi</i>      | 623 | M | J. Jalava, J. Kullberg         | 20.-22.6.1995               | Russia     | W-Sajan Mts., Krasnojarsk Reg.                                                | 52,78 | 93,30      |      |                     |
| MM16123           | <i>Elachista zernyi</i>      | 658 | M | J. Jalava, J. Kullberg         | 20.-22.6.1995               | Russia     | W-Sajan Mts., Krasnojarsk Reg.                                                | 52,78 | 93,30      |      | L. Kaila prep. 2843 |
| MM16124           | <i>Elachista zernyi</i>      | 658 | F | J. Jalava, J. Kullberg         | 03-Jul-1996                 | Russia     | Buryatiya, Barguzin Valley                                                    | 54,83 | 111,3<br>0 |      |                     |
| MM16125           | <i>Elachista zernyi</i>      | 658 | M | J. Jalava, J. Kullberg         | 4.-6.7.1996                 | Russia     | Buryatiya, Barguzin Range                                                     | 54,87 | 110,9<br>2 |      |                     |
| MM17654           | <i>Elachista zernyi</i>      | 658 |   | Jari Kaitila                   | 22-Jul-2000                 | Finland    | Laponia enontekiensis, Enontekiö                                              | 68,99 | 20,50      |      |                     |
| MM18554           | <i>Elachista zernyi</i>      | 658 |   | Ingvar Svensson                | 02-Jul-1995                 | Sweden     | Hr, Hamrafjaellet                                                             | 62,56 | 12,29      |      |                     |
| MM18555           | <i>Elachista zernyi</i>      | 658 |   | Ingvar Svensson                | 01-Jul-1995                 | Sweden     | Hr, Hamrafjaellet                                                             | 62,56 | 12,29      |      |                     |
| MM20931           | <i>Elachista zernyi</i>      | 658 | M | K. Nupponen                    | 17-Jun-2002                 | Russia     | Irkutsk, Irkutsk prov., Sludjanka village 2<br>km SE, Lake Baikal shope slope | 51,67 | 103,7<br>2 | 500  |                     |

|         |                    |         |   |                           |             |            |                                                                              |       |        |      |                     |
|---------|--------------------|---------|---|---------------------------|-------------|------------|------------------------------------------------------------------------------|-------|--------|------|---------------------|
| MM20932 | Elachista zernyi   | 407     | M | K. Nupponen               | 16-Jun-2002 | Russia     | Buryatiya, SW-Buryatia, East Sayan Mts., Halagun river, Turan village 8 km W | 51,64 | 101,58 | 900  |                     |
| MM20933 | Elachista zernyi   | 658     | M | K. Nupponen               | 15-Jun-2002 | Russia     | Buryatiya, SW-Buryatia, East Sayan Mts., Mondy village 2 km E                | 51,68 | 101,02 | 1450 |                     |
| MM22606 | Elachista zernyi   | 658     | M | J.-P. Kaitila             | 12-Jul-2008 | Finland    | Laponia enontekiensis, Enontekiö, Toshkajjoki                                | 69,16 | 21,58  |      |                     |
| MM16120 | Elachista sp. 01MM | 658     | M | K. Mikkola                | 14-Jul-1991 | Russia     | Chukot Autonomous Okrug, Chuckhi Pns, Provideniya                            | 64,92 | 172,50 |      | BAB prep. 396X      |
| MM16145 | Elachista sp. 02MM | 658     | M | J. Jalava, J. Kullberg    | 04-Jul-1994 | Russia     | Polar Ural, Europe Asia Pass                                                 | 67,03 | 65,08  |      | L. Kaila prep. 1208 |
| MM16146 | Elachista sp. 02MM | 639     | M | J. Jalava, J. Kullberg    | 04-Jul-1994 | Russia     | Polar Ural, Europe Asia Pass                                                 | 67,03 | 65,08  |      | L. Kaila prep. 4855 |
| MM16181 | Elachista sp. 03MM | 551[1n] | M | Jalava, Kullberg, Koponen | 02-Jul-1994 | Russia     | Polar Ural, Krasnyi Kamen                                                    | 66,08 | 65,17  |      | L.Kaila prep. 1209  |
| MM21420 | Elachista sp. 03MM | 658     | M | Jalava, Kullberg, Koponen | 02-Jul-1994 | Russia     | Polar Ural, Krasnyi Kamen                                                    | 66,55 | 65,10  | 200  |                     |
| MM21421 | Elachista sp. 04MM | 627     | M | L. Kaila                  | 31-Jul-1990 | Kyrgyzstan | Naryn, 45 km NE Naryn                                                        | 41,40 | 76,31  | 2650 |                     |
| MM21377 | Elachista sp. 05MM | 658     | M | Z. Tokar                  | 07-Jul-2000 | Slovenia   | Juliske Alpe, Mangart                                                        | 46,43 | 13,65  | 2000 |                     |
| MM21382 | Elachista sp. 05MM | 658     | M | Z. Tokar                  | 07-Jul-2000 | Slovenia   | Juliske Alpe, Mangart                                                        | 46,43 | 13,65  | 2000 |                     |
| MM21476 | Elachista sp. 06MM | 658     | M | K. Nupponen, R. Haverinen | 23-Jul-2010 | Kyrgyzstan | Alai mts, Tengiz-Bai pass                                                    | 39,38 | 72,14  | 3650 |                     |
| MM21477 | Elachista sp. 06MM | 650     | M | K. Nupponen, R. Haverinen | 23-Jul-2010 | Kyrgyzstan | Alai mts, Tengiz-Bai pass                                                    | 39,38 | 72,14  | 3650 |                     |
| MM16170 | Elachista sp. 07MM | 636     | M | Yu. Budashkin             | 19-May-1996 | Ukraine    | Krym, Karadagh                                                               | 44,90 | 35,20  |      |                     |
| MM21388 | Elachista sp. 07MM | 658     | F | Yu. Budashkin             | 20-May-1996 | Ukraine    | Crimea, Karadagh                                                             | 44,90 | 35,20  |      |                     |
| MM21389 | Elachista sp. 07MM | 658     | F | Yu. Budashkin             | 28-May-1996 | Ukraine    | Crimea, Karadagh                                                             | 44,90 | 35,20  |      |                     |
| MM21391 | Elachista sp. 07MM | 253     | F | Yu. Budashkin             | 12-Jun-1994 | Ukraine    | Crimea, Karadagh                                                             | 44,90 | 35,20  |      |                     |
| MM20908 | Elachista sp. 08MM | 658     | M | Jalava, Tammaru           | 08-Jul-1997 | Russia     | Magadan, Magadanskaya Oblast, Magadan 15 km E                                | 59,57 | 151,20 | 50   |                     |
| MM20914 | Elachista sp. 08MM | 658     | M | Jalava, Tammaru           | 08-Jul-1997 | Russia     | Magadan, Magadanskaya Oblast, Magadan 15 km E                                | 59,57 | 151,20 | 50   |                     |
| MM20915 | Elachista sp. 08MM | 658     | F | Jalava, Tammaru           | 07-Jul-1997 | Russia     | Magadan, Magadanskaya Oblast, Magadan 15 km E                                | 59,57 | 151,20 | 50   |                     |
| MM20916 | Elachista sp. 08MM | 658     | M | Jalava, Tammaru           | 07-Jul-1997 | Russia     | Magadan, Magadanskaya Oblast, Magadan 15 km E                                | 59,57 | 151,20 | 50   |                     |
| MM20917 | Elachista sp. 08MM | 658     | M | Jalava, Tammaru           | 07-Jul-1997 | Russia     | Magadan, Magadanskaya Oblast, Magadan 15 km E                                | 59,57 | 151,20 | 50   |                     |
| MM20857 | Elachista sp. 09MM | 658     | F | O. Karsholt               | 27-May-1994 | Greece     | Epirus, Ipiros, S. Metsova                                                   | 39,75 | 21,19  | 1550 |                     |
| MM21455 | Elachista sp. 09MM | 626     | M | O. Karsholt               | 27-May-1994 | Greece     | Epirus, Ipiros, S. Metsova                                                   | 39,75 | 21,19  | 1550 |                     |

|         |                    |         |   |                             |              |            |                                                          |       |       |      |                     |
|---------|--------------------|---------|---|-----------------------------|--------------|------------|----------------------------------------------------------|-------|-------|------|---------------------|
| MM20892 | Elachista sp. 10MM | 658     | M | T. Nupponen, K. Nupponen    | 25-Jun-2000  | Russia     | Altai Krai, Altai Mts., Kuraisky steppe                  | 50,25 | 87,88 | 1600 |                     |
| MM20880 | Elachista sp. 11MM | 658     | M | T. Nupponen, K. Nupponen    | 27-Jun-2000  | Russia     | Altai Krai, Altai Mts., Kuraisky hrebet                  | 50,30 | 87,88 | 2750 |                     |
| MM20893 | Elachista sp. 11MM | 658     | M | K. Nupponen                 | 08-Jul-2001  | Russia     | Altai Krai, Altai Mts., Kuraisky hrebet                  | 50,30 | 87,88 | 2300 |                     |
| MM20894 | Elachista sp. 11MM | 658     | F | K. Nupponen                 | 08-Jul-2001  | Russia     | Altai Krai, Altai Mts., Kuraisky hrebet                  | 50,30 | 87,88 | 2300 |                     |
| MM20967 | Elachista sp. 11MM | 658     | M | K. Nupponen                 | 07-Jul-2001  | Russia     | Altai Krai, Altai mnts., Kuraisky hrebet                 | 50,27 | 87,83 | 2300 |                     |
| MM20972 | Elachista sp. 11MM | 658     | M | K. Nupponen                 | 11-Jul-2001  | Russia     | Altai Krai, Altai mnts., Kuraisky hrebet                 | 50,27 | 87,83 | 2300 |                     |
| MM20878 | Elachista sp. 12MM | 658     | M | T. Nupponen, K. Nupponen    | 24-Jun-2000  | Russia     | Altai Krai, Altai Mts., Sarlyk region                    | 51,00 | 85,58 | 1450 |                     |
| MM20886 | Elachista sp. 12MM | 658     | F | T. Nupponen, K. Nupponen    | 24-Jun-2000  | Russia     | Altai Krai, Altai Mts., Sarlyk region                    | 51,00 | 85,58 | 1450 |                     |
| MM20968 | Elachista sp. 12MM | 658     | M | K. Nupponen                 | 10-Jul-2001  | Russia     | Altai Krai, Altai mnts., Kuraisky hrebet                 | 50,27 | 87,83 | 2300 |                     |
| MM20969 | Elachista sp. 12MM | 658     | M | K. Nupponen                 | 09-Jul-2001  | Russia     | Altai Krai, Altai mnts., Kuraisky hrebet                 | 50,27 | 87,83 | 2300 |                     |
| MM20971 | Elachista sp. 12MM | 658     | M | K. Nupponen                 | 07-Jul-2001  | Russia     | Altai Krai, Altai mnts., Kuraisky hrebet                 | 50,27 | 87,83 | 2300 |                     |
| MM20973 | Elachista sp. 12MM | 658     | M | K. Nupponen                 | 09-Jul-2001  | Russia     | Altai Krai, Altai mnts., Kuraisky hrebet                 | 50,27 | 87,83 | 2300 |                     |
| MM21468 | Elachista sp. 12MM | 658     | M | K. Nupponen                 | 11-Jul-2001  | Russia     | Altai Krai, Altai Mts, Kuraisky hrebet                   | 50,16 | 87,50 | 2300 |                     |
| MM21470 | Elachista sp. 12MM | 658     | M | K. Nupponen                 | 13-Jul-2001  | Russia     | Altai Krai, Altai Mts, Kuraisky hrebet                   | 50,16 | 87,50 | 2300 |                     |
| MM21472 | Elachista sp. 12MM | 658     | F | K. Nupponen                 | 06-Jul-2001  | Russia     | Altai Krai, Altai Mts, Kuraisky hrebet                   | 50,16 | 87,50 | 2300 |                     |
| MM21473 | Elachista sp. 12MM | 411     | M | K. Nupponen                 | 07-Jul-2001  | Russia     | Altai Krai, Altai Mts, Kuraisky hrebet                   | 50,16 | 87,50 | 2300 |                     |
| MM21474 | Elachista sp. 12MM | 658     | M | K. Nupponen                 | 10-Jul-2001  | Russia     | Altai Krai, Altai Mts, Kuraisky hrebet                   | 50,16 | 87,50 | 2300 |                     |
| MM21475 | Elachista sp. 12MM | 406[2n] | M | K. Nupponen                 | 07-Jul-2001  | Russia     | Altai Krai, Altai Mts, Kuraisky hrebet                   | 50,16 | 87,50 | 2300 |                     |
| MM22535 | Elachista sp. 12MM | 658     | M | J. Jalava, J. Kullberg      | 17-Jun-1995  | Russia     | Tyva, Tannu-Ola Mts                                      | 50,50 | 94,19 | 2175 |                     |
| MM22536 | Elachista sp. 12MM | 658     | M | J. Jalava, J. Kullberg      | 17-Jun-1995  | Russia     | Tyva, Tannu-Ola Mts                                      | 50,50 | 94,19 | 2175 |                     |
| MM22541 | Elachista sp. 13MM | 658     | M | K. Nupponen                 | 05-Aug-2010  | Kyrgyzstan | Tien-Shan Mts., Eki-Naryn                                | 41,31 | 76,30 | 2600 |                     |
| MM15492 | Elachista sp. 14MM | 658     | M | K. Nupponen, J. Junnilainen | 06-May-1996  | Turkey     | Aksehir, Sultan Daglari                                  | 38,33 | 31,33 |      | L. Kaila prep. 3017 |
| MM15493 | Elachista sp. 14MM | 658     | M | T. Nupponen                 | 09-Jun-2002  | Turkey     | Aksehir, Sultan Daglari                                  | 38,33 | 31,33 |      |                     |
| MM15494 | Elachista sp. 14MM | 658     | M | J. Junnilainen              | 9.-13.5.2000 | Turkey     | Aksehir, Cetince                                         | 38,18 | 31,21 |      |                     |
| MM21341 | Elachista sp. 14MM | 259     | M | J. Junnilainen              | 20-May-2005  | Turkey     | Aksehir, Sultan Daglari                                  | 38,33 | 31,33 |      |                     |
| MM21649 | Elachista sp. 15MM | 658     | M | J. Tabell                   | 02-May-2012  | Greece     | Crete, Omalos 2 km NNE                                   | 35,34 | 23,90 | 1030 |                     |
| MM22599 | Elachista sp. 16MM | 658     | M | K. Nupponen, J. Junnilainen | 26-Jun-1997  | Russia     | Chelyabinsk, South Ural, Miass town, Ilmen State Reserve | 55,01 | 60,10 | 350  |                     |

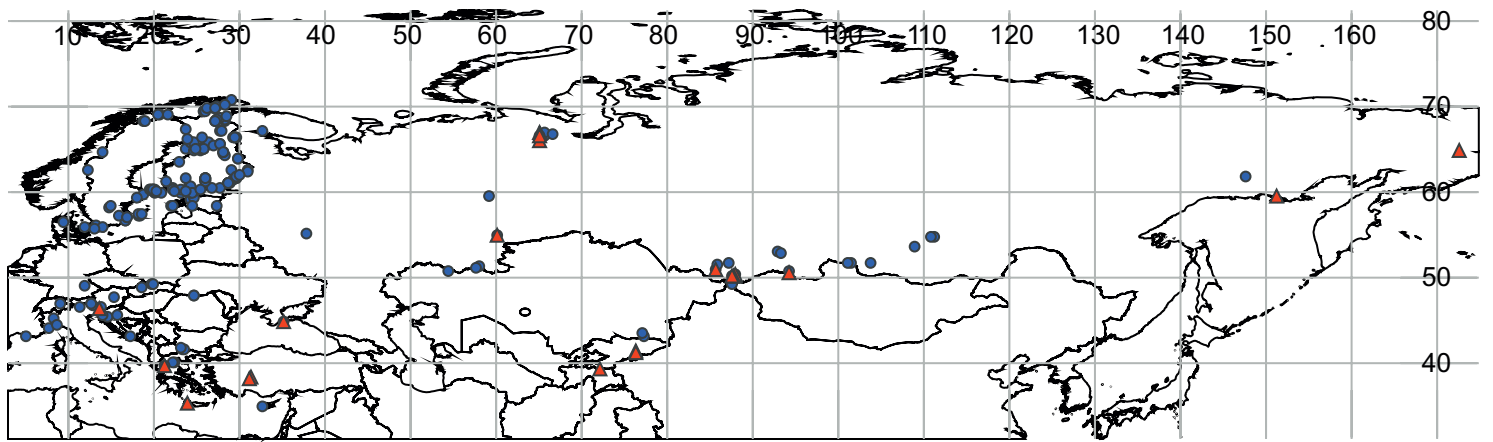

Figure S1. A map of collection localities of the samples included in this study. Records representing named species are depicted as blue dots, records representing putative new species as red triangles. Each of the 16 putative new species was found only in a single locality. The map was created using the SimpleMapp<sup>64</sup>.

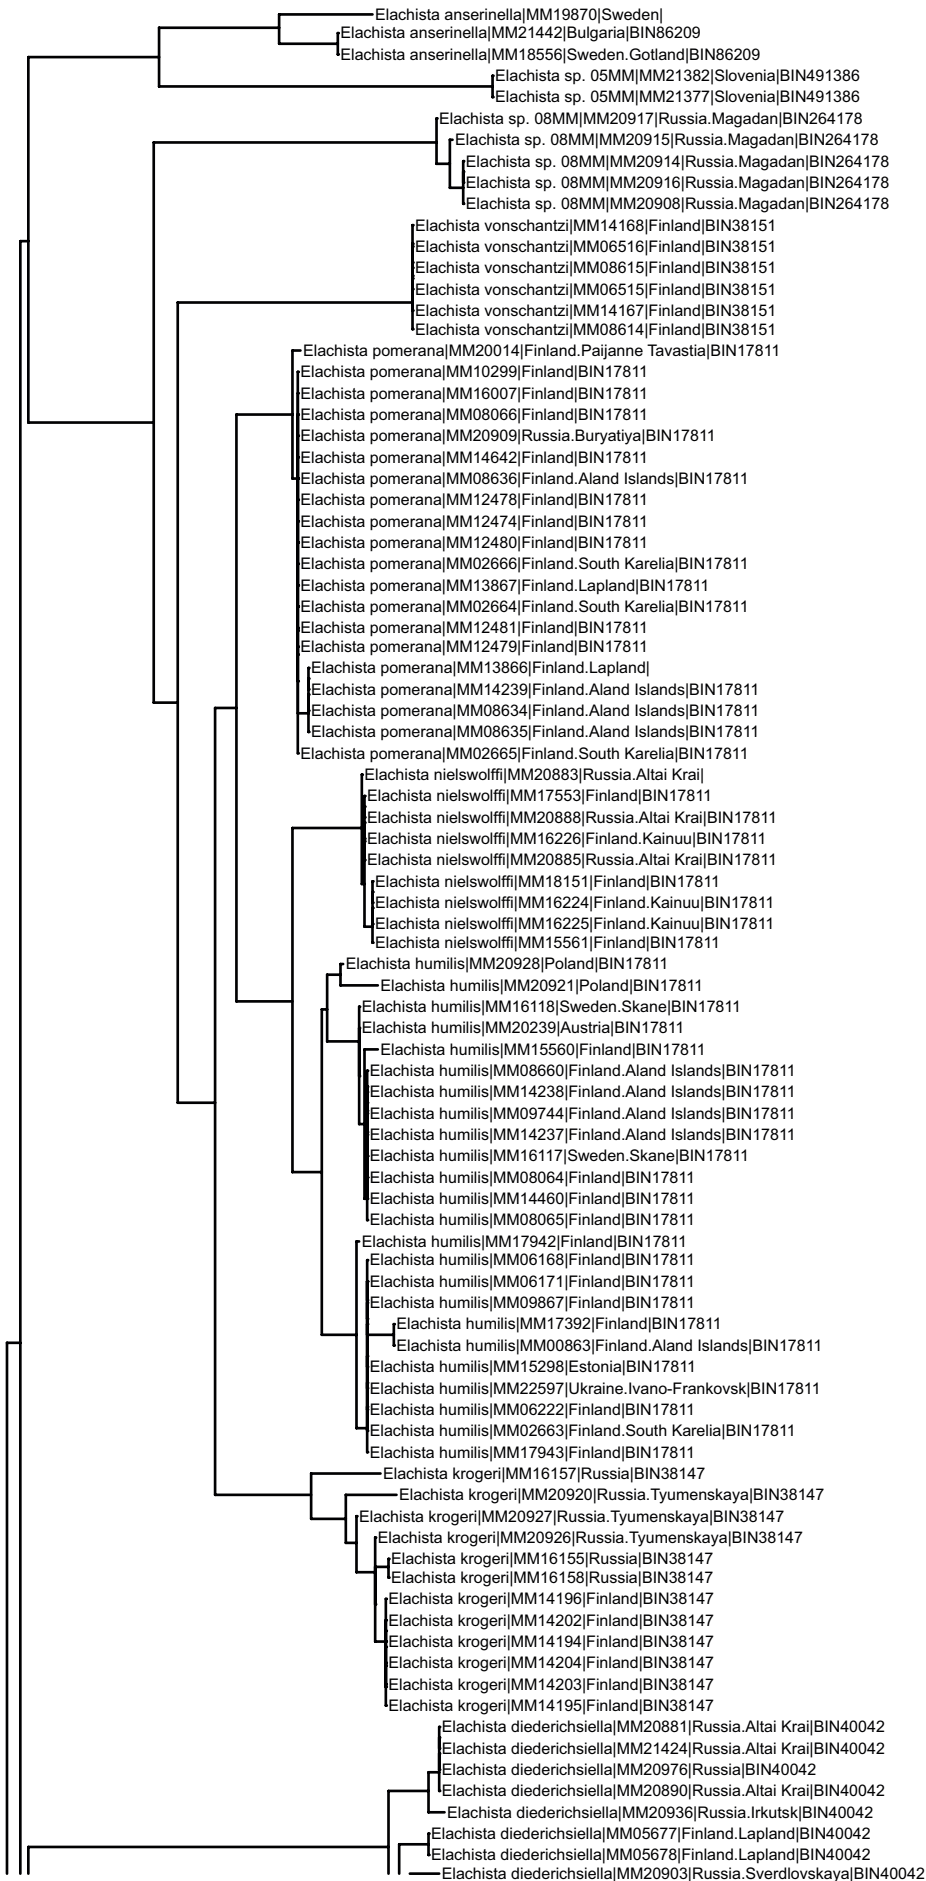



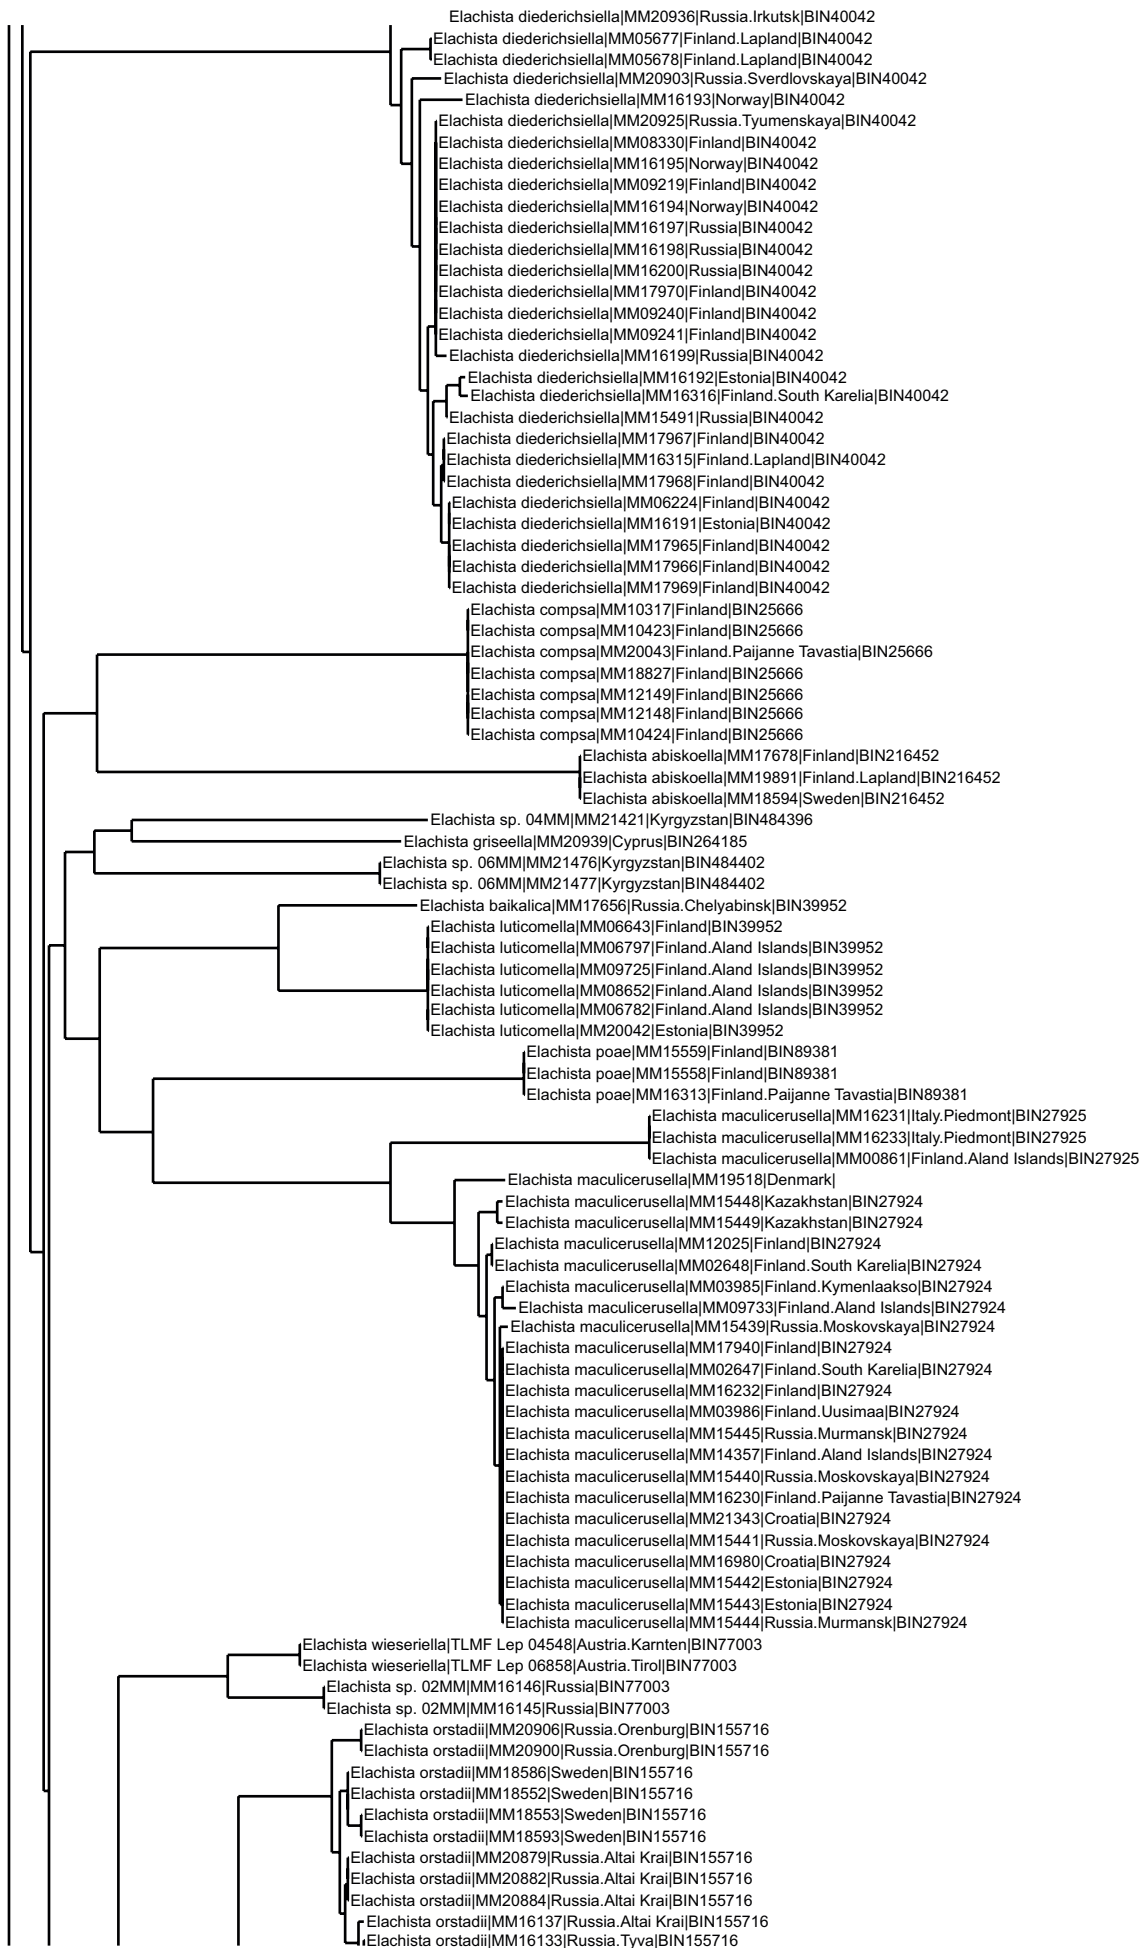

Elachista orstadii|MM20884|Russia.Altai Krai|BIN155716  
Elachista orstadii|MM16137|Russia.Altai Krai|BIN155716  
Elachista orstadii|MM16133|Russia.Tyva|BIN155716  
Elachista orstadii|MM21454|Greece.Epirus|BIN155716  
Elachista orstadii|MM21452|Greece.Epirus|BIN155716  
Elachista orstadii|MM21453|Greece.Epirus|BIN155716  
Elachista orstadii|MM20901|Russia.Orenburg|  
Elachista orstadii|MM20970|Russia.Altai Krai|  
Elachista orstadii|MM16136|Russia.Altai Krai|BIN155716  
Elachista sp. 07MM|MM21389|Ukraine|BIN89389  
Elachista sp. 07MM|MM21388|Ukraine|BIN89389  
Elachista sp. 07MM|MM16170|Ukraine.Krym|BIN89389  
Elachista sp. 07MM|MM21391|Ukraine|  
Elachista atricomella|MM20988|Croatia|BIN89389  
Elachista atricomella|MM20937|Bulgaria|BIN89389  
Elachista atricomella|MM20942|Greece|BIN89389  
Elachista atricomella|MM21445|Greece|BIN89389  
Elachista atricomella|MM20938|Bulgaria|BIN89389  
Elachista atricomella|MM21444|Greece|BIN89389  
Elachista atricomella|MM20940|Bulgaria|BIN89389  
Elachista atricomella|MM19862|Sweden|BIN89389  
Elachista atricomella|MM18546|Sweden.Gotland|BIN89389  
Elachista atricomella|MM17257|Sweden|BIN89389  
Elachista atricomella|MM18547|Sweden.Gotland|BIN89389  
Elachista atricomella|MM20987|Croatia|BIN89389  
Elachista atricomella|MM21447|Austria.Tirol|BIN89389  
Elachista atricomella|MM21386|Slovakia|BIN89389  
Elachista atricomella|MM20989|Croatia|BIN89389  
Elachista atricomella|MM20022|Estonia|BIN89389  
Elachista atricomella|MM20023|Estonia|BIN89389  
Elachista atricomella|MM20918|Estonia|BIN89389  
Elachista atricomella|MM17256|Sweden|BIN89389  
Elachista atricomella|MM21387|Slovenia|BIN89389  
Elachista atricomella|MM16223|Estonia|BIN89389  
Elachista sp. 14MM|MM15494|Turkey|BIN89389  
Elachista sp. 14MM|MM15492|Turkey|BIN89389  
Elachista sp. 14MM|MM21341|Turkey|  
Elachista sp. 14MM|MM15493|Turkey|BIN89389  
Elachista sp. 13MM|MM22541|Kyrgyzstan|BIN155442  
Elachista sp. 12MM|MM21475|Russia.Altai Krai|  
Elachista sp. 12MM|MM20971|Russia.Altai Krai|BIN155442  
Elachista sp. 12MM|MM21468|Russia.Altai Krai|BIN155442  
Elachista sp. 12MM|MM20969|Russia.Altai Krai|BIN155442  
Elachista sp. 12MM|MM21473|Russia.Altai Krai|  
Elachista sp. 12MM|MM21470|Russia.Altai Krai|BIN155442  
Elachista sp. 12MM|MM21472|Russia.Altai Krai|BIN155442  
Elachista sp. 12MM|MM22536|Russia.Tyva|BIN155442  
Elachista sp. 12MM|MM21474|Russia.Altai Krai|BIN155442  
Elachista sp. 12MM|MM20878|Russia.Altai Krai|BIN155442  
Elachista sp. 12MM|MM22535|Russia.Tyva|BIN155442  
Elachista sp. 12MM|MM20968|Russia.Altai Krai|BIN155442  
Elachista sp. 12MM|MM20973|Russia.Altai Krai|BIN155442  
Elachista sp. 12MM|MM20886|Russia.Altai Krai|BIN155442  
Elachista subnigrella|MM15299|Estonia|BIN155442  
Elachista subnigrella|MM16245|Austria|BIN155442  
Elachista subnigrella|MM18551|Sweden|BIN155442  
Elachista subnigrella|MM19866|Sweden|BIN155442  
Elachista subnigrella|MM16131|Sweden|BIN155442  
Elachista subnigrella|MM16132|Sweden|BIN155442  
Elachista subnigrella|MM18550|Sweden|BIN155442  
Elachista fuscofrontella|MM16175|Estonia|BIN157299  
Elachista fuscofrontella|MM21451|Russia.Orenburg|BIN157299  
Elachista albicapilla|MM20832|France|BIN264189  
Elachista albifrontella|MM20891|Russia.Altai Krai|BIN40022  
Elachista albifrontella|MM12029|Finland|BIN40022  
Elachista albifrontella|MM06161|Finland|BIN40022  
Elachista albifrontella|MM06598|Finland|BIN40022  
Elachista albifrontella|MM14309|Finland.Aland Islands|BIN40022  
Elachista albifrontella|MM02662|Finland.South Karelia|BIN40022  
Elachista albifrontella|MM06514|Finland|BIN40022  
Elachista albifrontella|MM20887|Russia.Altai Krai|BIN40022  
Elachista albifrontella|MM14235|Finland.Aland Islands|BIN40022  
Elachista deriventa|MM14012|Finland|BIN38121  
Elachista deriventa|MM14011|Finland|BIN38121  
Elachista deriventa|MM16310|Finland.Paijanne Tavastia|BIN38121  
Elachista deriventa|MM04316|Finland|BIN38121  
Elachista deriventa|MM15197|Finland|BIN38121  
Elachista deriventa|MM14008|Finland|BIN38121  
Elachista deriventa|MM14009|Finland|BIN38121  
Elachista deriventa|MM14010|Finland|BIN38121  
Elachista zernyi|MM20932|Russia.Buryatiya|  
Elachista zernyi|MM20933|Russia.Buryatiya|BIN155631  
Elachista zernyi|MM16124|Russia.Buryatiya|BIN155631  
Elachista zernyi|MM16123|Russia|BIN155631  
Elachista zernyi|MM16121|Russia|BIN155631  
Elachista zernyi|MM16125|Russia.Buryatiya|BIN155631  
Elachista zernyi|MM16122|Russia|BIN155631  
Elachista zernyi|MM18555|Sweden|BIN155631  
Elachista zernyi|MM18554|Sweden|BIN155631  
Elachista zernyi|MM20931|Russia.Irkutsk|BIN155631  
Elachista zernyi|MM17654|Finland|BIN155631

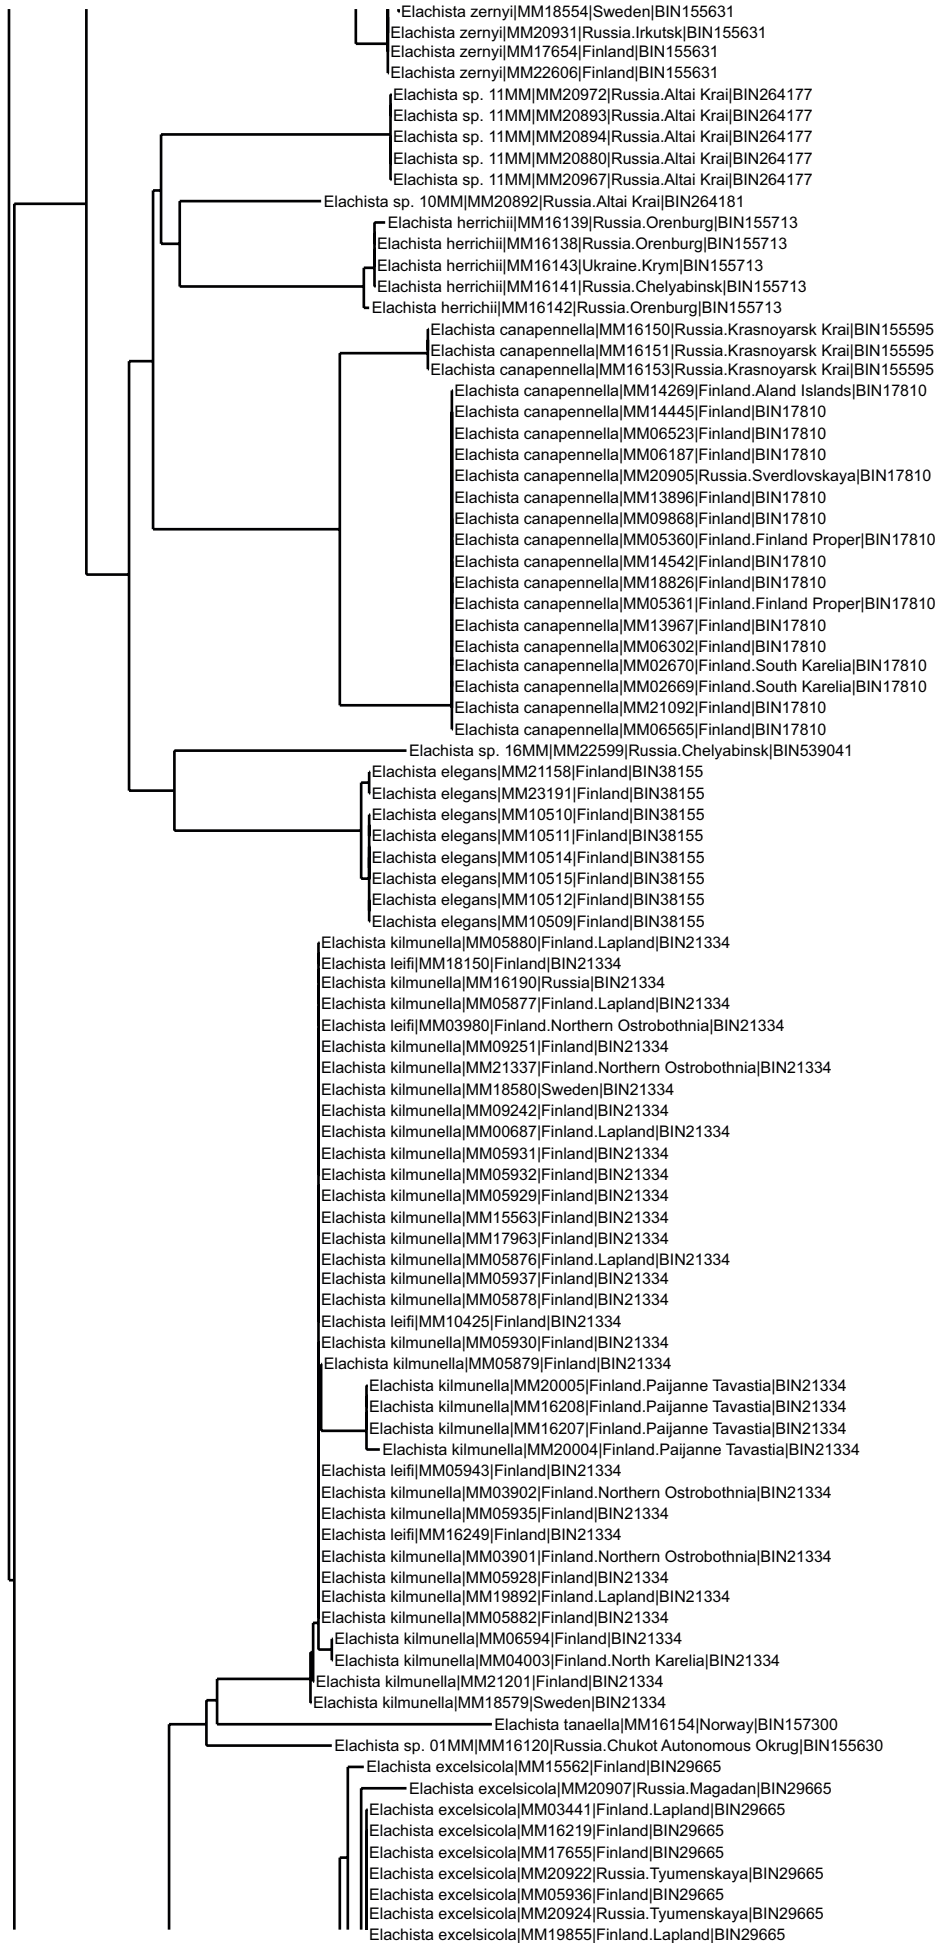

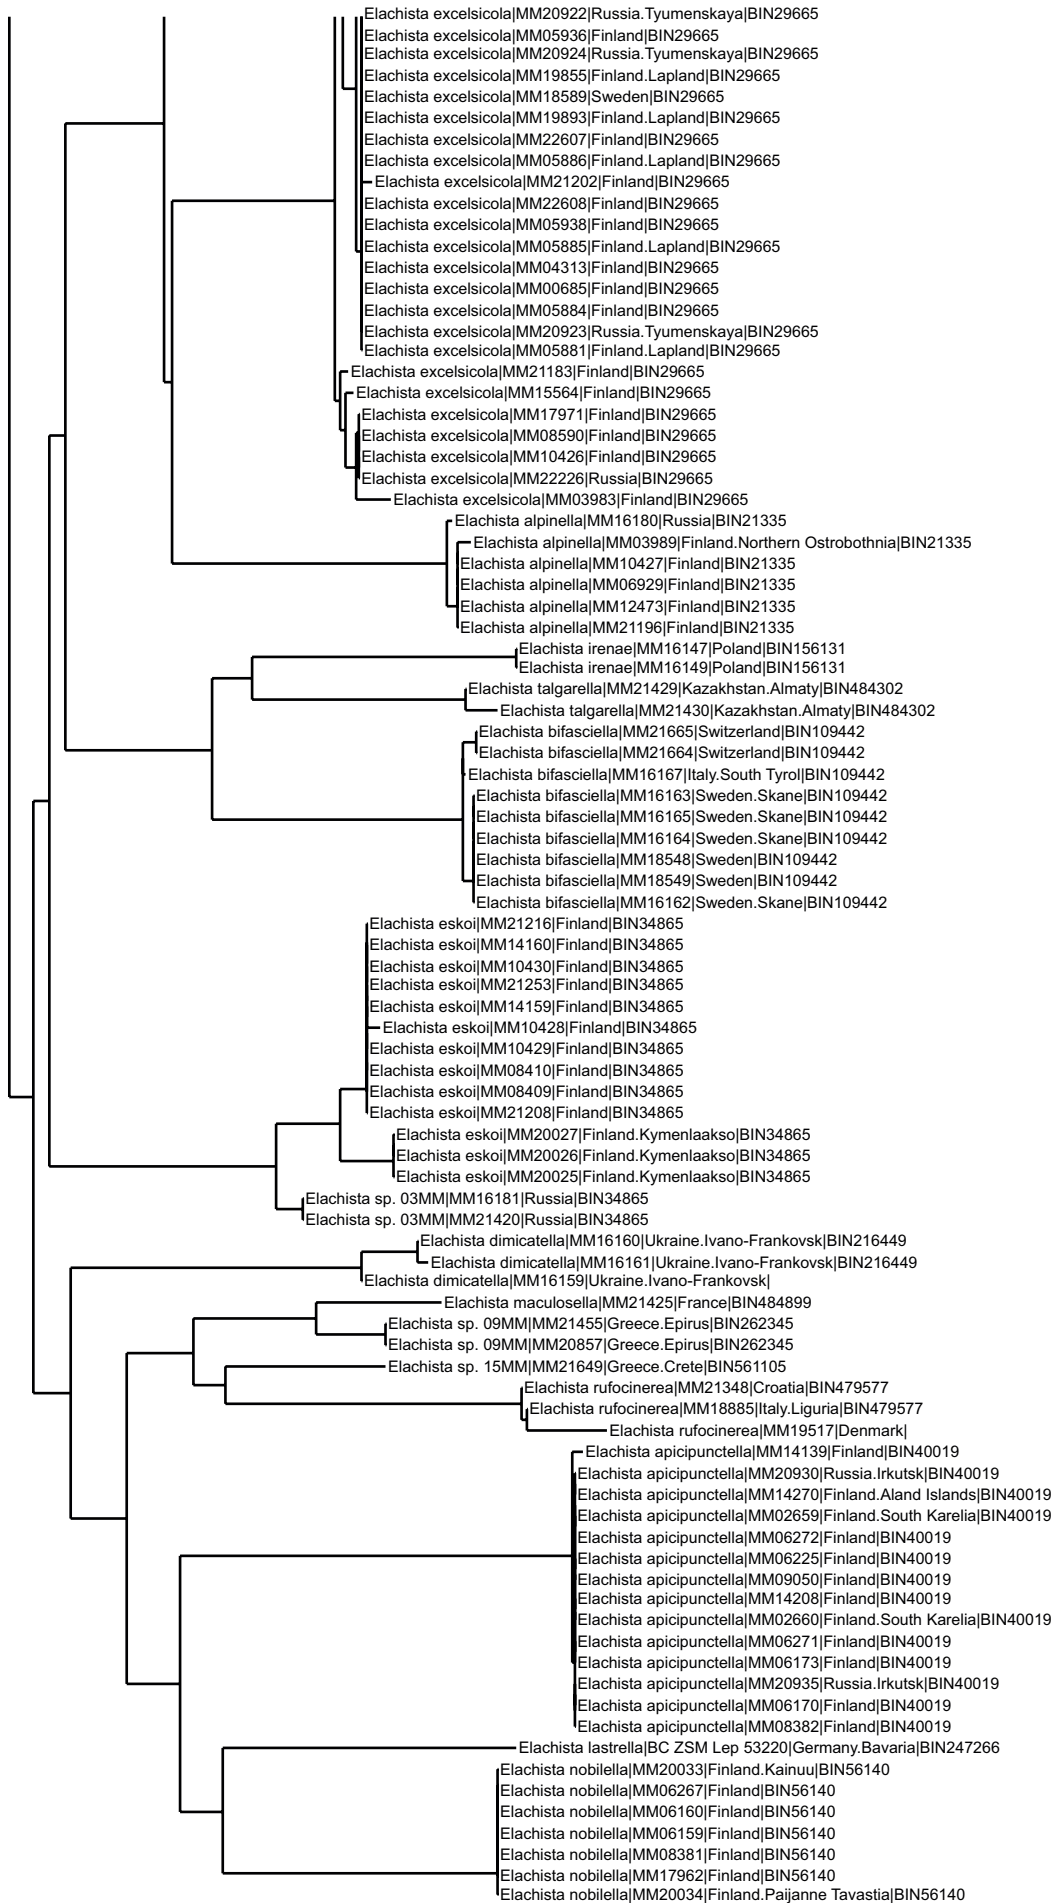

Figure S2. A detailed Neighbor-Joining tree, generated under the K2P nucleotide substitution model, of the study taxa with BIN numbers indicated for each specimen. The tree includes the outgroup species (*E. abiskoella*) but is not rooted to it.
